# Supplementary material for: Chemical warfare between leafcutter ant symbionts and a co-evolved pathogen
Source: PubMed Central journal article supplement (PMC5992151; doi:10.1038/s41467-018-04520-1), 2018-06-07
Supplement: 41467_2018_4520_MOESM1_ESM.pdf [file 41467_2018_4520_MOESM1_ESM.pdf]

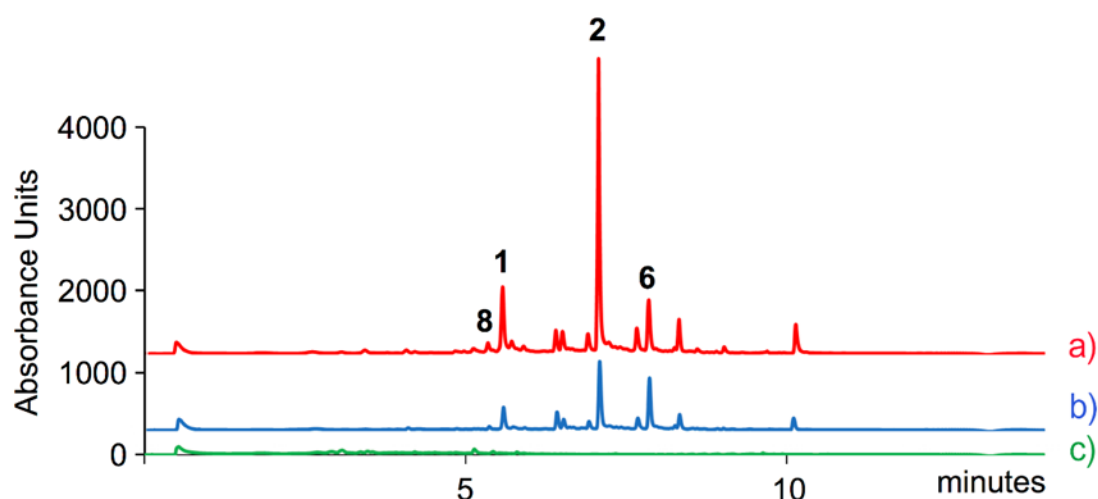

**Supplementary Figure 1 | *Escovopsis* pathogenesis involves upregulation of small molecule virulence factors.** UPLC profiles ( $\lambda_{\text{abs}}$  254 nm) of ethyl acetate extracts of a) *L. gongylophorus* infected with *E. weberi* strain A; b) *E. weberi* strain A axenic culture; and c) *L. gongylophorus* axenic culture. Compounds are: **1** = melinacidin IV; **2** = shearinine D; **6** = shearinine A; and **8** = emodin. This experiment was carried out independently in the Hutchings/Wilkinson lab (Norwich), but the results are similar to those from the experiment carried out in Jena (Fig. 2, main text). Agar plates (9 cm diameter) containing 25 ml R5 agar<sup>1</sup> were each inoculated with 100  $\mu$ l spore stock solution of *Escovopsis weberi* strain A. For the co-cultivation experiments, freshly ground *L. gongylophorus* fungus garden (1 g) was distributed over an R5 agar plate that was freshly inoculated with *Escovopsis weberi* as described above. Equivalent *L. gongylophorus* monoculture plates were prepared in the same way (without *E. weberi*). The plates were incubated for 7 days at room temperature in the dark. The agar was then chopped into small pieces and extracted with ethyl acetate (5 ml). The material was filtered, the filtrate evaporated under reduced pressure and dissolved in methanol (1.5 ml) for subsequent UPLC (UV & MS) analysis. Analytical UPLC was carried out on an Accela UPLC system (Thermo Scientific) using a Kinetex<sup>®</sup> 1.7  $\mu$ m C18 100 Å, 100 x 2.1 mm column (Phenomenex). The mobile phase was a mixture of solvent A (0.1% formic acid in water) and solvent B (methanol) with a gradient as follows: solvent A/B initial condition 90/10, hold at 90/10 for 1 min, linear gradient up to 0/100 within 9.00 min, hold for 2.00 min, returned to 90/10 within 0.5 min, hold at 90/10 for 1.5 min; flow rate was 0.6 ml min<sup>-1</sup>. Mean area of **1** for the co-culture (n=2; 1839548 au<sup>2</sup>) and for the axenic culture (n=2; 849645 au<sup>2</sup>); mean area of **2** for the co-culture (n=2; 6431606 au<sup>2</sup>) and for the axenic culture (n=2; 2221102 au<sup>2</sup>).

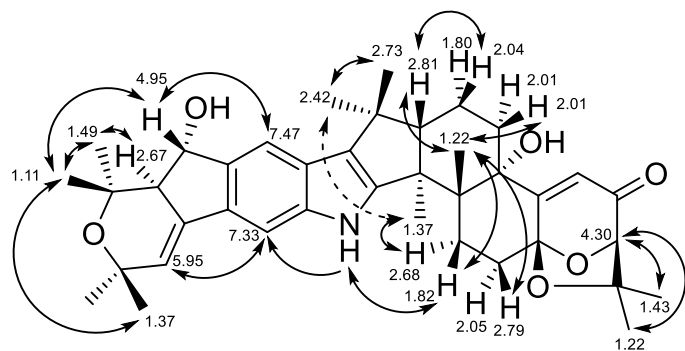

**Supplementary Figure 2 | NOESY NMR data for shearinine D (2) confirming its relative configuration.**

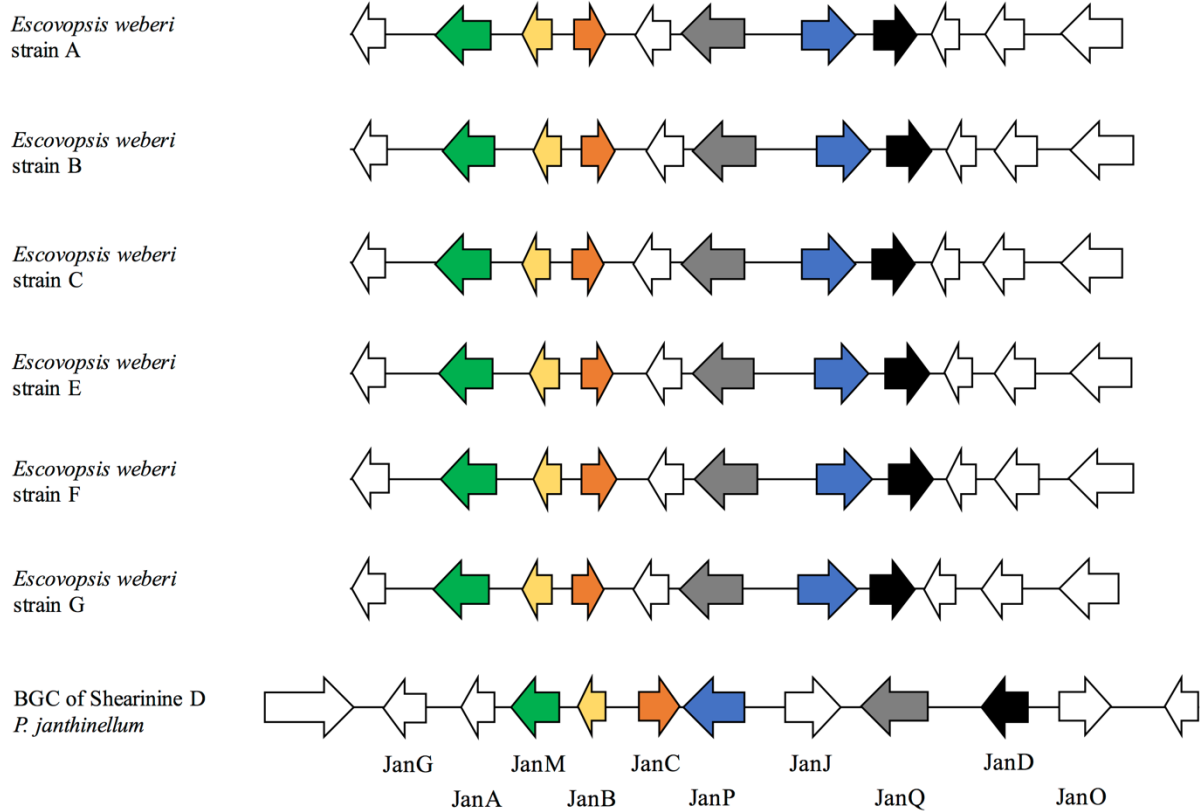

**Supplementary Figure 3 | Analysis of the terpene-indole alkaloid biosynthetic gene clusters (BGCs) present in the genomes of sequenced *Escovopsis* strains (Supplementary Table 1).** The *Escovopsis* BGCs share similarity to the BGC for the production of shearinines in *P. janthinellum*<sup>2</sup>. While the genes *janB-D*, *janM*, *janP* and *janQ* constitute part of the BGC in these strains, homologues for *janG* (a geranylgeranyl pyrophosphate synthase) and *janO* (an FAD dependent monooxygenase) occur at a distinct location in the genome (KOS21612.1 and KOS22754.1, respectively in strain G). No homologues could be identified for *janA* and *janJ*. No such BGC is present in strain D. The annotated BGC from strain G was given the accession number TPA: BK010418.

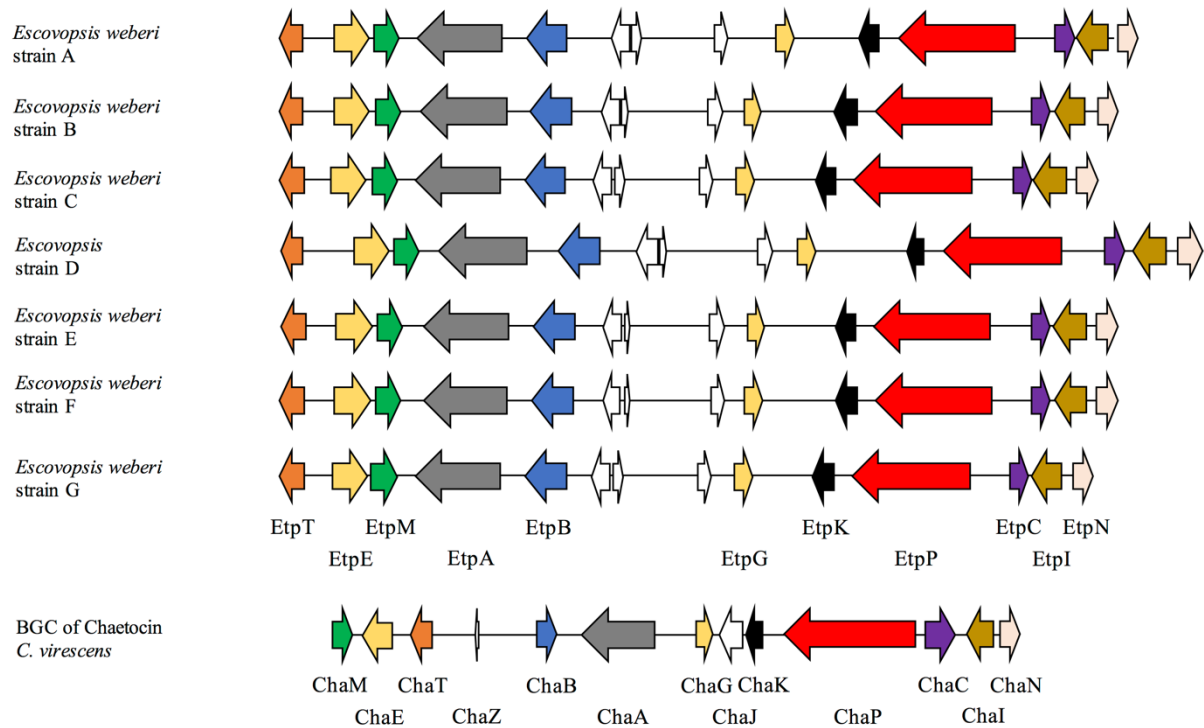

**Supplementary Figure 4 | Analysis of the epipolythiodiketopiperazine (ETP) BGCs present in the genomes of sequenced *Escovopsis* strains.** ETP BGCs are present in all the sequenced *Escovopsis* strains. The *Escovopsis* BGCs share similarity to the BGC for production of the ETP chaetocin in *C. virescens*<sup>3</sup>. Homologues for the putative regulator *chaZ* and dipeptidase *chaJ* could not be identified. The annotated BGC from strain G was given the accession number TPA: BK010420.

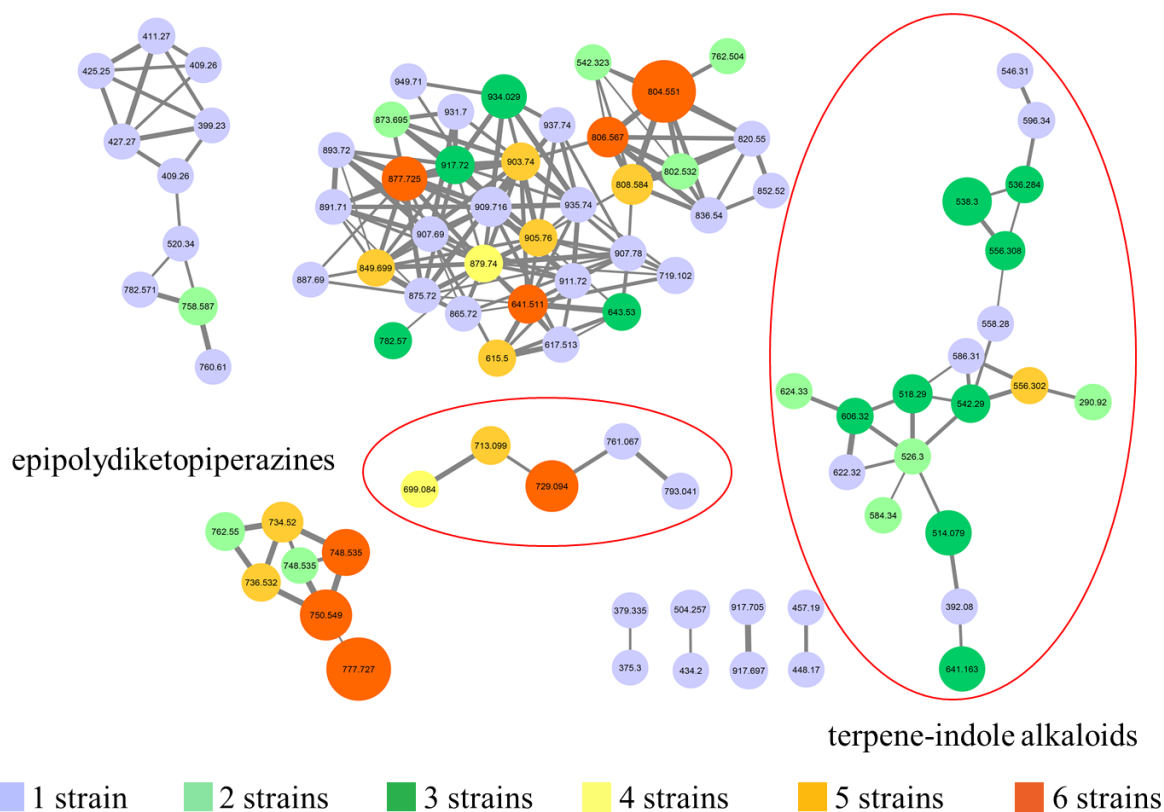

**Supplementary Figure 5 | Global metabolomics analysis of *Escovopsis* strains.** Molecular network of metabolites of *Escovopsis* strains A-F. The size of each node represents the number of spectra present for a specific feature. The color of each node represents the number of strains that share the respective metabolite. The ETP and terpene-indole alkaloid networks are highlighted; the remaining networks relate to unidentified natural product families produced by *Escovopsis* strains.

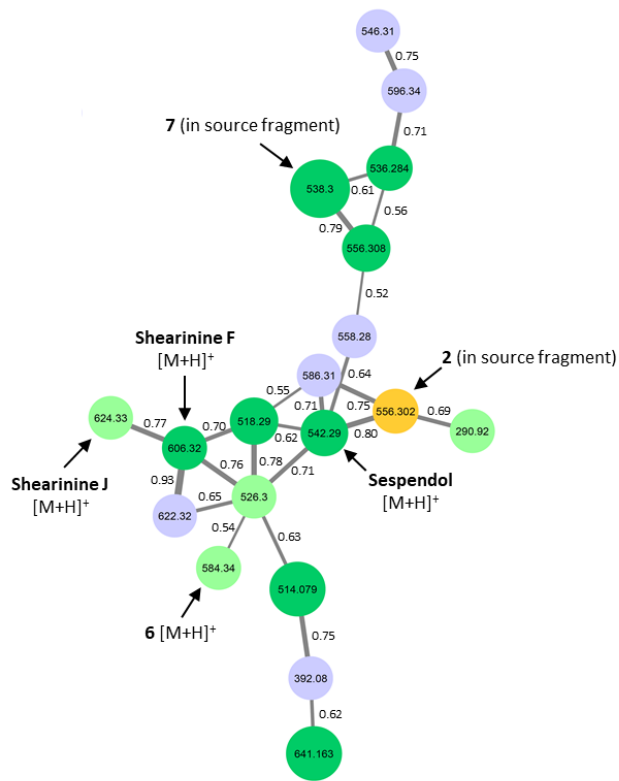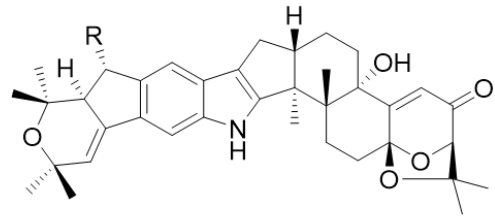

2 Shearinine D: R = OH:  
6 Shearinine A: R = H:

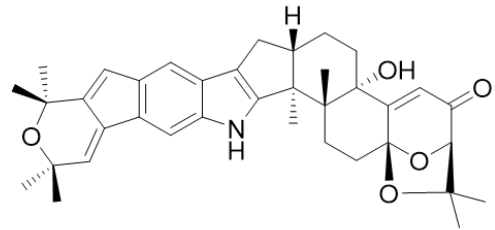

7 22,23-dehydroshearinine A

Supplementary Figure 6 | Molecular network and chemical structures of terpene-indole alkaloids being produced by *E. weberi* strains A-C, E and F.

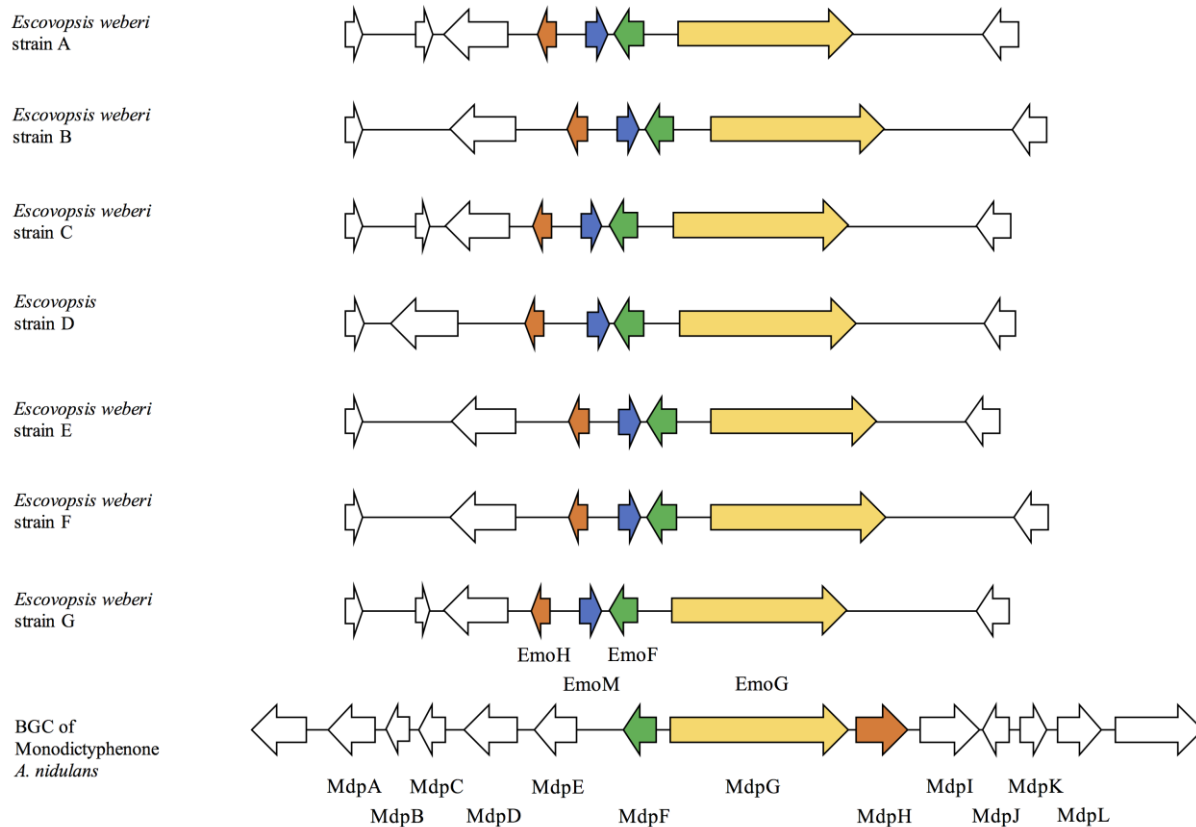

**Supplementary Figure 7 | Analysis of the proposed emodin BGCs present in the genomes of sequenced *Escovopsis* strains.** Emodin BGCs are present in all of the sequenced *Escovopsis* strains. The *Escovopsis* BGCs share similarity to the BGC for production of monodictyphenone in *Aspergillus nidulans*<sup>4</sup>. Emodin is an intermediate in the monodictyphenone pathway and as such the emodin BGC is stripped down to contain only the genes necessary for production of emodin. A PKS can form the tricyclic precursor to emodin followed by a beta-lactamase-like enzyme that performs an analogous function to a thioesterase and hydrolyses altrochrysonic acid from the acyl carrier protein domain. Decarboxylation (by EmoH) and dehydration (by EmoM) complete emodin production. The annotated cluster from strain G was given the accession number TPA: BK010419.

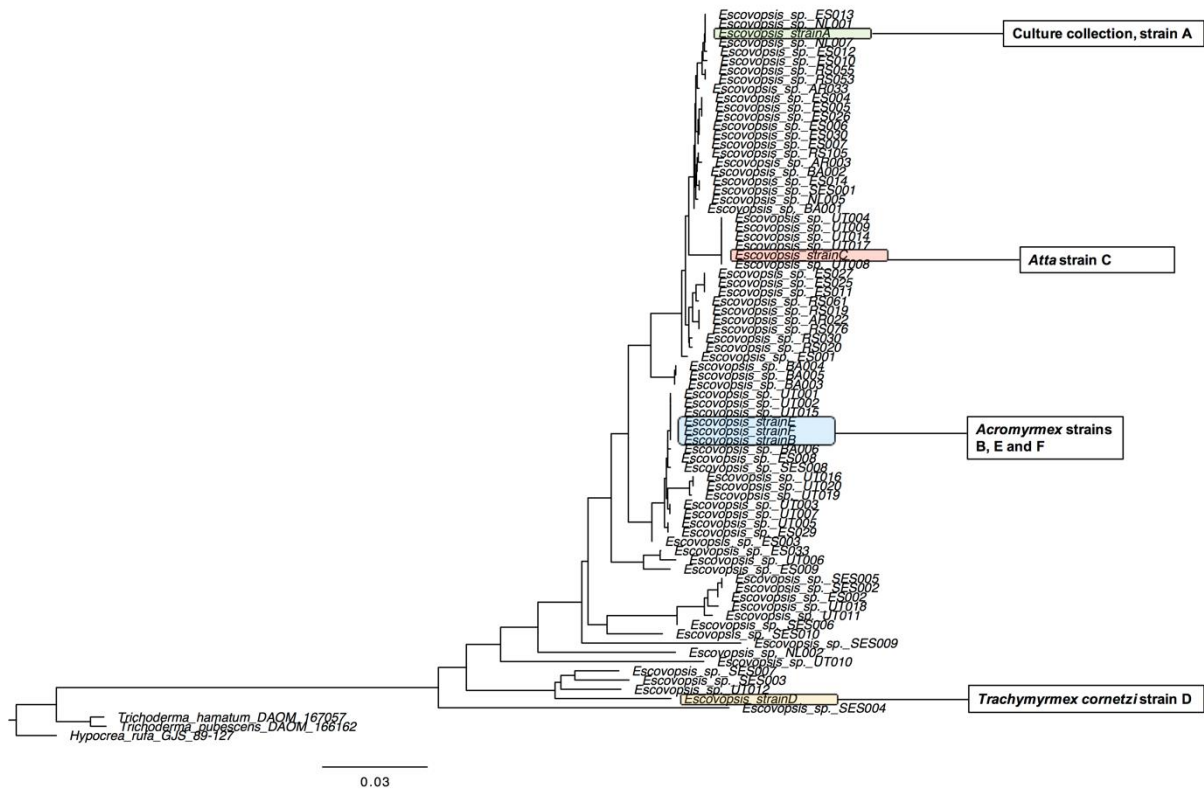

**Supplementary Figure 8 | Phylogenetic analysis of *Escovopsis* strains.** Clustal Omega (1.2.4)<sup>5</sup> was used to generate alignments of *tefl* gene sequences from *Escovopsis* strains A-F and those recovered from GenBank (accession codes: KM817113 to KM817173, KF240730, KF240731, EU082795 to EU082803, AF534585, AF534620, AF534624<sup>6,7,8</sup>). Similarly alignments were made with internal transcriber spacer (ITS) gene sequences from *Escovopsis* strains A-F and those recovered from Genbank (accession codes: KM817043 to KM817112, X93980, EU280124, NR\_077179<sup>7,9,10</sup>). Alignments were concatenated using WINCLADA (ver 1.61)<sup>11</sup>. A phylogenetical tree was constructed using FigTree v1.4.3 2016: <http://tree.bio.ed.ac.uk/software/figtree/>. *Hypocrea rufa* GJS 89-127 was selected as the root. The sequences for strains A-F and their sources are highlighted. The scale bar represents 3% sequence divergence. The ITS sequence for *Escovopsis* strain D was amplified with primers ITS1 and ITS4, sequenced and deposited with Genbank accession: MG897412.



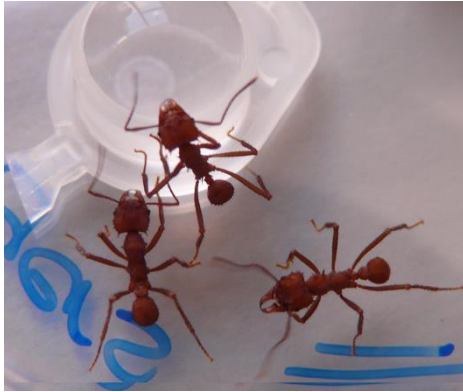

**Supplementary Figure 9 | *Acromyrmex echinator* worker ants feeding from an Eppendorf cap filled with a 5% glucose solution supplemented with compound 2.**

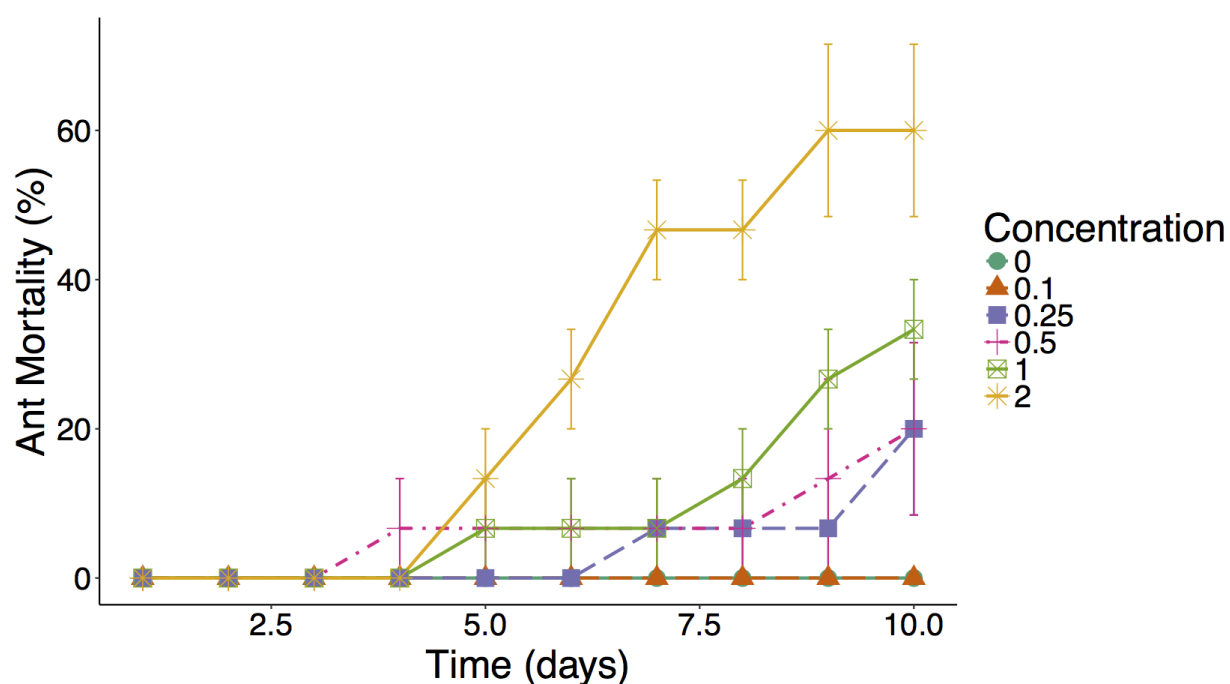

**Supplementary Figure 10 | Average cumulative percentage mortality of worker ants in experimental groups receiving different concentrations (mM) of compound 2 over 10 days.** Values represent the average percentage mortality in groups of ants across three replicate runs of the experiment (error bars  $\pm$  SE;  $n = 5$  ants per treatment level, in each run of the experiment).

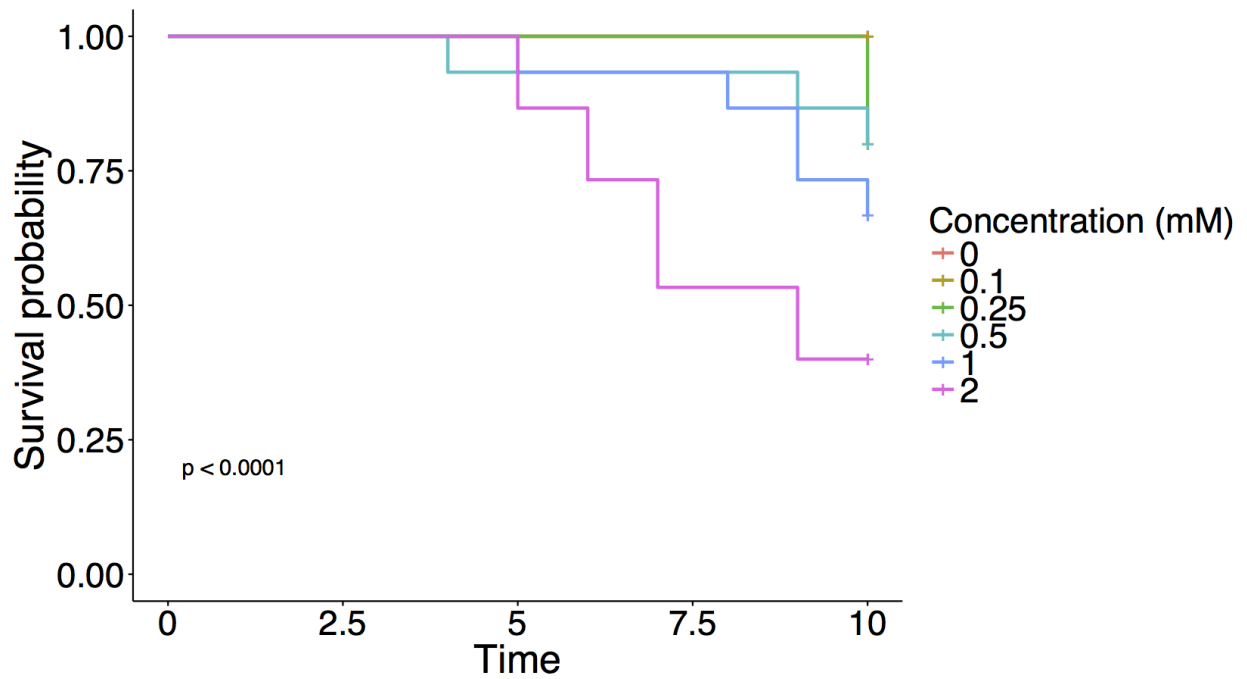

**Supplementary Figure 11 | Kaplan Meier survival curve indicating the probability of ant survival over time and at various concentrations (mM) of compound 2.** A Cox's mixed effects model indicated that higher concentrations significantly reduced survival probability over time ( $P = <0.001$ ).

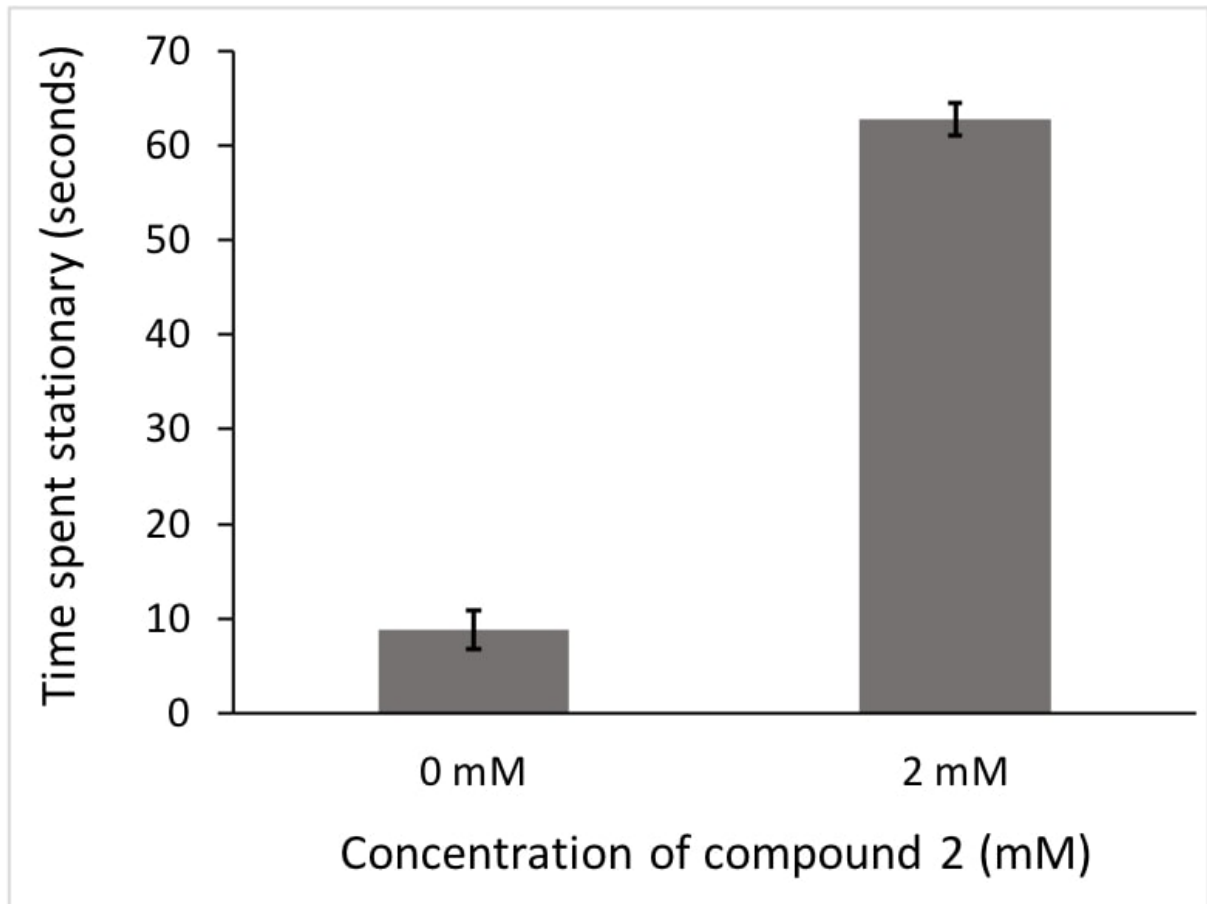

**Supplementary Figure 12 | A comparison of the mobility of ants receiving different concentrations of compound 2.** The average number of seconds ( $\pm$  SE) spent stationary (out of 65 seconds of film) was calculated from time lapse videos.  $N = 5$  ants in each treatment group. There was a significant difference between the two treatments ( $t_{(7.73)} = 19.74$ ,  $P = <0.001$ , Welch's t-test).

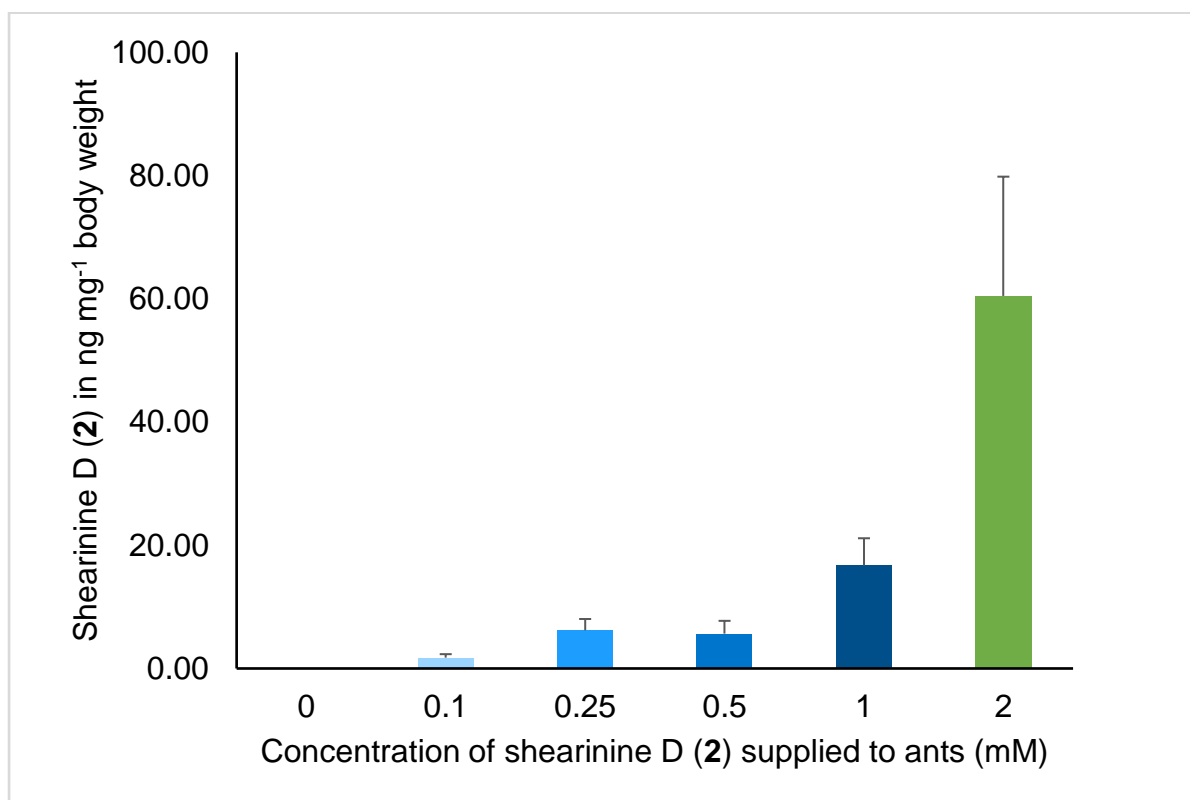

**Supplementary Figure 13 | Concentrations of compound 2 ( $\pm$  SE) detected in ants treated with a 5% glucose solution containing various quantities of compounds 2.**

| Strain | Source                                              | Location / Date            | No. contigs / N50 (Mbp) | Genome size (Mbp) | GenBank accession code | Reference                                                  |
|--------|-----------------------------------------------------|----------------------------|-------------------------|-------------------|------------------------|------------------------------------------------------------|
| A      | Isolated from an unknown attine species in Colombia | Unknown                    | 13 / 3.9                | 27.38             | NIGB000000             | Strain CBS 810.71 Westerdijk Fungal Biodiversity Institute |
| B      | <i>Acromyrmex echinator</i> colony Ae733            | Gamboa, Panama / 2015      | 25 / 2.26               | 29.98             | NQYR000000             | This study                                                 |
| C      | <i>Atta colombica</i> colony                        | Gamboa, Panama / 2015      | 13 / 4.28               | 27.14             | NQYS000000             | This study                                                 |
| D      | <i>Trachomyrmex cornetzi</i> colony 177605          | Gamboa, Panama / 2015      | 19 / 6.16               | 38.32             | NIGD000000             | This study                                                 |
| E      | <i>Acromyrmex echinator</i> colony Ae720            | Gamboa, Panama / 2015      | 234 / 0.79              | 31.56             | NQYQ000000             | This study                                                 |
| F      | <i>Acromyrmex echinator</i> colony Ae724            | Gamboa, Panama / 2015      | 17 / 3.26               | 29.91             | NIGC000000             | This study                                                 |
| G      | <i>Atta cephalotes</i> colony                       | Gamboa, Panama. / unknown. | 29 / 2.58               | 27.20             | LGSR000000             | Reference 12                                               |

**Supplementary Table 1** | *Escovopsis* strains used in this study.

| <i>Escovopsis</i> strain                        | Strain A                     | Strain B                     | Strain C                     | Strain E                     | Strain F                     | Strain G                               |
|-------------------------------------------------|------------------------------|------------------------------|------------------------------|------------------------------|------------------------------|----------------------------------------|
| <b>Contig</b>                                   | SC08                         | SC03                         | SC06                         | SC020                        | SC02                         | LGSR0100001<br>9.1                     |
|                                                 |                              |                              |                              |                              |                              |                                        |
| <b>Gene name<br/>(predicted<br/>function)</b>   | <b>Strain A<br/>position</b> | <b>Strain B<br/>position</b> | <b>Strain C<br/>position</b> | <b>Strain E<br/>position</b> | <b>Strain F<br/>position</b> | <b>Strain G<br/>position</b>           |
|                                                 |                              |                              |                              |                              |                              | <b>Gene<br/>Identifier</b>             |
| ORF (unknown)                                   | 1358116<br>to<br>1357058     | 3174683<br>to<br>3173618     | 109708<br>to<br>110768       | 258204 to<br>259269          | 2917808<br>to<br>2916743     | 931768 to<br>930709<br><br>ESCO_005796 |
| JanM (FAD-<br>dependent mono-<br>oxygenase)     | 1361548<br>to<br>1359746     | 3178189<br>to<br>3176477     | 106272<br>to<br>108077       | 254697 to<br>256410          | 2921314<br>to<br>2919602     | 935204 to<br>933399<br><br>ESCO_005797 |
| JanB (integral<br>membrane<br>protein)          | 1363497<br>to<br>1362565     | 3180319<br>to<br>3179384     | 104334<br>to<br>105256       | 252565 to<br>253499          | 2923444<br>to<br>2922509     | 937138 to<br>936220<br><br>ESCO_005798 |
| JanC (prenyl<br>transferase)                    | 1364204<br>to<br>1365194     | 3180994<br>to<br>3181997     | 103624<br>to<br>102634       | 251890 to<br>250887          | 2924119<br>to<br>2925122     | 937848 to<br>938838<br><br>ESCO_005799 |
| ORF (unknown)                                   | 1367362<br>to<br>1366223     | 3184270<br>to<br>3183147     | 100461<br>to<br>101600       | 248614 to<br>249737          | 2927392<br>to<br>2926269     | 941008 to<br>939869<br><br>ESCO_005800 |
| JanQ<br>(cytochrome<br>P450 mono-<br>oxygenase) | 1369762<br>to<br>1367784     | 3186658<br>to<br>3184666     | 98063 to<br>100041           | 246226 to<br>248218          | 2929779<br>to<br>2927787     | 943406 to<br>941428<br><br>ESCO_005801 |
| JanP (cytochrome<br>P450 mono-<br>oxygenase)    | 1371625<br>to<br>1373361     | 3188604<br>to<br>3190329     | 96220 to<br>94484            | 244280 to<br>242555          | 2931725<br>to<br>2933450     | 945249 to<br>946985<br><br>ESCO_005802 |
| JanD (aromatic<br>prenyl<br>transferase)        | 1373947<br>to<br>1375341     | 3190925<br>to<br>3192343     | 93898 to<br>92504            | 241955 to<br>240537          | 2934050<br>to<br>2935468     | 947571 to<br>948965<br><br>ESCO_005803 |
| ORF (unknown)                                   | 1376706<br>to<br>1375837     | 3193704<br>to<br>3192831     | 91137 to<br>92007            | 239176 to<br>240049          | 2936829<br>to<br>2935956     | 950332 to<br>949462<br><br>ESCO_005804 |

|               |                          |                          |                   |                     |                          |                     |
|---------------|--------------------------|--------------------------|-------------------|---------------------|--------------------------|---------------------|
| ORF (unknown) | 1378830<br>to<br>1377531 | 3195749<br>to<br>3194407 | 89011 to<br>90313 | 237134 to<br>238473 | 2938871<br>to<br>2937532 | 952457 to<br>951156 |
|               |                          |                          |                   |                     |                          | ESCO_005805         |
| ORF (unknown) | 1381992<br>to<br>1379995 | 3198854<br>to<br>3196857 | 85848 to<br>87845 | 234031 to<br>236028 | 2941976<br>to<br>2939979 | 955620 to<br>953623 |
|               |                          |                          |                   |                     |                          | ESCO_005806         |

**Supplementary Table 2 | Position of genes and predicted function for the terpene-indole alkaloid BGCs in the genomes of sequenced *Escovopsis* strains.** The annotated BGC from strain G was given the accession number TPA: BK010418.



| <i>Escovopsis</i> strain              | Strain G          | <i>P. Janthinellum</i><br>Jan Cluster | E value | Identities    |
|---------------------------------------|-------------------|---------------------------------------|---------|---------------|
| <b>Contig</b>                         | LGSR01000019.1    | KF280651                              |         |               |
|                                       |                   |                                       |         |               |
| Gene name (predicted function)        | Strain G position | Gene Name                             |         |               |
|                                       | Gene Identifier   | Gene Identifier                       |         |               |
| JanM (FAD-dependent mono-oxygenase)   | 935204 to 933399  | JanM                                  | 1e-105  | 159/390 (41%) |
|                                       | ESCO_005797       | AGZ20480                              |         |               |
| JanB (integral membrane protein)      | 937138 to 936220  | JanB                                  | 3e-90   | 127/234 (54%) |
|                                       | ESCO_005798       | AGZ20474                              |         |               |
| JanC (prenyl transferase)             | 937848 to 938838  | JanC                                  | 1e-98   | 139/280 (50%) |
|                                       | ESCO_005799       | AGZ20475                              |         |               |
| JanQ (cytochrome P450 mono-oxygenase) | 943406 to 941428  | JanQ                                  | 6e-119  | 185/510 (36%) |
|                                       | ESCO_005801       | AGZ20487                              |         |               |
| JanP (cytochrome P450 mono-oxygenase) | 945249 to 946985  | JanP                                  | 2e-131  | 196/474 (41%) |
|                                       | ESCO_005802       | AGZ20476                              |         |               |
| JanD (aromatic prenyl transferase)    | 947571 to 948965  | JanD                                  | 1e-34   | 112/418 (27%) |
|                                       | ESCO_005803       | AGZ20478                              |         |               |
| <b>Contig</b>                         | LGSR01000008.1    | KF280651                              |         |               |
| JanG                                  | 230627 to 231592  | JanG                                  | 2e-119  | 169/310 (55%) |
|                                       | ESCO_005024       | AGZ20472                              |         |               |
| <b>Contig</b>                         | LGSR01000002.1    | KF280651                              |         |               |
| JanO                                  | 653147 to 653800  | JanO                                  | 5e-158  | 219/444 (49%) |
|                                       | ESCO_003538       | AGZ20488                              |         |               |

**Supplementary Table 3 | BLASTP<sup>13</sup> analysis of the proteins encoded by the terpene-indole alkaloid BGC from *P. janthinellum*<sup>2</sup> and the reference genome of *Escovopsis* strain G. Similarity was assessed according to E value and shared amino acid identities.**

| <i>Escovopsis</i> strain              | Strain G                        | Strain A                 | E value                            | Identities                                                                           | Strain B                 | E value                                         | Identities                                                      | Strain C                 | E value                             | Identities                                                                           | Strain E                 | E value                                 | Identities                                                      | Strain F                 | E value                                 | Identities                                                      |
|---------------------------------------|---------------------------------|--------------------------|------------------------------------|--------------------------------------------------------------------------------------|--------------------------|-------------------------------------------------|-----------------------------------------------------------------|--------------------------|-------------------------------------|--------------------------------------------------------------------------------------|--------------------------|-----------------------------------------|-----------------------------------------------------------------|--------------------------|-----------------------------------------|-----------------------------------------------------------------|
| <b>Contig</b>                         | LGSR01000019.1                  | SC08                     |                                    |                                                                                      | SC03                     |                                                 |                                                                 | SC06                     |                                     |                                                                                      | SC020                    |                                         |                                                                 | SC02                     |                                         |                                                                 |
|                                       |                                 |                          |                                    |                                                                                      |                          |                                                 |                                                                 |                          |                                     |                                                                                      |                          |                                         |                                                                 |                          |                                         |                                                                 |
| <b>Gene name (predicted function)</b> | <b>Strain G position</b>        | <b>Strain A position</b> |                                    |                                                                                      | <b>Strain B position</b> |                                                 |                                                                 | <b>Strain C position</b> |                                     |                                                                                      | <b>Strain E position</b> |                                         |                                                                 | <b>Strain F position</b> |                                         |                                                                 |
|                                       | <b>Gene Identifier</b>          |                          |                                    |                                                                                      |                          |                                                 |                                                                 |                          |                                     |                                                                                      |                          |                                         |                                                                 |                          |                                         |                                                                 |
| ORF (unknown)                         | 931768 to 930709<br>ESCO_005796 | 1358116 to 1357058       | 6e-143,<br>2e-73                   | 191/201 (95%),<br>106/111 (95%)                                                      | 3174683 to 3173618       | 2e-137,<br>4e-71                                | 182/196 (93%),<br>100/111 (90%)                                 | 109708 to 110768         | 0.0                                 | 295/322 (92%)                                                                        | 258204 to 259269         | 4e-138,<br>4e-71                        | 183/196 (93%),<br>100/111 (90%)                                 | 2917808 to 2916743       | 2e-137,<br>4e-71                        | 182/196 (93%),<br>100/111 (90%)                                 |
| JanM (FAD-dependent mono-oxygenase)   | 935204 to 933399<br>ESCO_005797 | 1361548 to 1359746       | 0.0, 0.0,<br>0.0                   | 183/214 (86%),<br>125/132 (95%), 79/81 (98%)                                         | 3178189 to 3176477       | 0.0                                             | 335/476 (70%)                                                   | 106272 to 108077         | 0.0,<br>0.0,<br>0.0                 | 186/214 (87%),<br>125/132 (95%), 81/81 (100%)                                        | 254697 to 256410         | 0.0,<br>0.0                             | 266/360 (74%),<br>72/85 (85%)                                   | 2921314 to 2919602       | 0.0                                     | 335/476 (70%)                                                   |
| JanB (integral membrane protein)      | 937138 to 936220<br>ESCO_005798 | 1363497 to 1362565       | 7e-121,<br>1e-46                   | 172/174 (99%), 70/71 (99%)                                                           | 3180319 to 3179384       | 3e-118,<br>7e-46                                | 167/174 (96%),<br>68/71 (96%)                                   | 104334 to 105256         | 5e-127,<br>5e-47                    | 174/174 (100%),<br>71/71 (100%)                                                      | 252565 to 253499         | 3e-118,<br>1e-44                        | 167/174 (96%),<br>68/71 (96%)                                   | 2923444 to 2922509       | 3e-118,<br>7e-46                        | 167/174 (96%),<br>68/71 (96%)                                   |
| JanC (prenyl transferase)             | 937848 to 938838<br>ESCO_005799 | 1364204 to 1365194       | 5e-127,<br>1e-71                   | 171/171 (100%),<br>104/105 (99%)                                                     | 3180994 to 3181997       | 1e-156,<br>1e-156                               | 189/200 (95%),<br>97/105 (92%)                                  | 103624 to 102634         | 5e-127,<br>1e-71                    | 171/171 (100%),<br>105/107 (98%)                                                     | 251890 to 250887         | 1e-155,<br>1e-155                       | 189/200 (95%),<br>96/105 (91%)                                  | 2924119 to 2925122       | 1e-156,<br>1e-156                       | 189/200 (95%),<br>97/105 (92%)                                  |
| ORF (unknown)                         | 941008 to 939869<br>ESCO_005800 | 1367362 to 1366223       | 8e-125,<br>7e-66                   | 204/241 (85%),<br>110/113 (97%)                                                      | 3184270 to 3183147       | 1e-102,<br>9e-67                                | 168/197 (85%),<br>100/113 (88%)                                 | 100461 to 101600         | 6e-131,<br>2e-68                    | 212/241 (88%),<br>113/113 (100%)                                                     | 248614 to 249737         | 3e-101,<br>9e-67                        | 167/197 (85%),<br>100/113 (88%)                                 | 2927392 to 2926269       | 8e-107,<br>9e-67                        | 169/197 (86%),<br>100/113 (88%)                                 |
| JanQ (cytochrome P450 mono-oxygenase) | 943406 to 941428<br>ESCO_005801 | 1369762 to 1367784       | 0.0, 0.0,<br>0.0, 0.0,<br>0.0, 0.0 | 141/142 (99%),<br>140/144 (97%), 76/78 (97%), 77/99 (78%), 58/59 (98%), 36/36 (100%) | 3186658 to 3184666       | 0.0,<br>6e-121,<br>6e-121,<br>6e-121,<br>6e-121 | 257/323 (80%),<br>136/188 (72%),<br>64/89 (72%),<br>33/36 (92%) | 98063 to 100041          | 0.0,<br>0.0,<br>0.0,<br>0.0,<br>0.0 | 141/142 (99%),<br>143/144 (99%), 76/78 (97%), 77/99 (78%), 59/60 (98%), 36/36 (100%) | 246226 to 248218         | 0.0,<br>6e-121,<br>6e-121,<br>6e-121    | 257/323 (80%),<br>136/188 (72%),<br>64/89 (72%),<br>33/36 (92%) | 2929779 to 2927787       | 0.0,<br>6e-121,<br>6e-121,<br>6e-121    | 257/323 (80%),<br>136/188 (72%),<br>64/89 (72%),<br>33/36 (92%) |
| JanP (cytochrome P450 mono-oxygenase) | 945249 to 946985<br>ESCO_005802 | 1371625 to 1373361       | 0.0, 0.0,<br>0.0, 0.0,<br>0.0      | 223/223 (100%),<br>71/71 (100%),<br>86/93 (92%),<br>65/65 (100%),                    | 3188604 to 3190329       | 0.0,<br>0.0,<br>0.0,<br>9e-38,<br>2e-27         | 213/230 (93%),<br>77/101 (76%),<br>84/93 (90%),<br>64/65 (98%), | 96220 to 94484           | 0.0,<br>0.0,<br>0.0,<br>0.0         | 223/223 (100%),<br>71/71 (100%),<br>86/93 (92%),<br>65/65 (100%),                    | 244280 to 242555         | 0.0,<br>0.0,<br>0.0,<br>9e-38,<br>2e-27 | 213/230 (93%),<br>74/86 (86%),<br>84/93 (90%),<br>64/65 (98%),  | 2931725 to 2933450       | 0.0,<br>0.0,<br>0.0,<br>9e-38,<br>2e-27 | 213/230 (93%),<br>77/101 (76%),<br>84/93 (90%),<br>64/65 (98%), |

|                                    |                  |                    |                        |                                           |                    |                        |                                           |                |                        |                                            |                  |                        |                                           |                    |                        |                                           |
|------------------------------------|------------------|--------------------|------------------------|-------------------------------------------|--------------------|------------------------|-------------------------------------------|----------------|------------------------|--------------------------------------------|------------------|------------------------|-------------------------------------------|--------------------|------------------------|-------------------------------------------|
|                                    |                  |                    |                        | 51/51 (100%)                              |                    |                        | 48/52 (92%)                               |                |                        | 51/51 (100%)                               |                  |                        | 48/52 (92%)                               |                    |                        | 48/52 (92%)                               |
| JanD (aromatic prenyl transferase) | 947571 to 948965 | 1373947 to 1375341 | 0.0, 0.0, 0.0          | 224/226 (99%), 147/150 (98%), 37/38 (97%) | 3190925 to 3192343 | 2e-141, 2e-89, 1e-21   | 214/240 (89%), 139/150 (93%), 40/55 (73%) | 93898 to 92504 | 0.0, 0.0, 0.0          | 225/226 (99%), 149/150 (99%), 38/38 (100%) | 241955 to 240537 | 2e-141, 2e-89, 1e-21   | 214/240 (89%), 139/150 (93%), 40/55 (73%) | 2934050 to 2935468 | 0.0, 0.0, 1e-21        | 212/230 (92%), 139/150 (93%), 40/55 (73%) |
|                                    | ESCO_005803      |                    |                        |                                           |                    |                        |                                           |                |                        |                                            |                  |                        |                                           |                    |                        |                                           |
| ORF (unknown)                      | 950332 to 949462 | 1376706 to 1375837 | 7e-130, 7e-130, 7e-130 | 137/137 (100%), 72/74 (97%), 25/25 (100%) | 3193704 to 3192831 | 8e-117, 8e-117, 8e-117 | 131/137 (96%), 69/74 (93%), 25/25 (100%)  | 91137 to 92007 | 1e-129, 1e-129, 1e-129 | 137/137 (100%), 74/74 (100%), 25/25 (100%) | 239176 to 240049 | 8e-117, 8e-117, 8e-117 | 131/137 (96%), 69/74 (93%), 25/25 (100%)  | 2936829 to 2935956 | 8e-117, 8e-117, 8e-117 | 131/137 (96%), 69/74 (93%), 25/25 (100%)  |
|                                    | ESCO_005804      |                    |                        |                                           |                    |                        |                                           |                |                        |                                            |                  |                        |                                           |                    |                        |                                           |
| ORF (unknown)                      | 952457 to 951156 | 1378830 to 1377531 | 0.0, 0.97              | 323/326 (99%), 6/6 (100%)                 | 3195749 to 3194407 | 0.0, 1.5               | 310/326 (95%), 6/6 (100%)                 | 89011 to 90313 | 0.0, 0.97              | 326/326 (100%), 6/6 (100%)                 | 237134 to 238473 | 0.0, 1.5               | 310/326 (95%), 6/6 (100%)                 | 2938871 to 2937532 | 0.0, 1.5               | 310/326 (95%), 6/6 (100%)                 |
|                                    | ESCO_005805      |                    |                        |                                           |                    |                        |                                           |                |                        |                                            |                  |                        |                                           |                    |                        |                                           |
| ORF (unknown)                      | 955620 to 953623 | 1381992 to 1379995 | 0.0                    | 663/665 (99%)                             | 3198854 to 3196857 | 0.0                    | 630/665 (95%)                             | 85848 to 87845 | 0.0                    | 665/665 (100%)                             | 234031 to 236028 | 0.0                    | 630/665 (95%)                             | 2941976 to 2939979 | 0.0                    | 630/665 (95%)                             |
|                                    | ESCO_005806      |                    |                        |                                           |                    |                        |                                           |                |                        |                                            |                  |                        |                                           |                    |                        |                                           |

**Supplementary Table 4 | BLASTX<sup>13</sup> analysis of the proteins encoded by the terpene-indole alkaloid BGC from the reference genome of *Escovopsis* strain G and the nucleotide sequences of the terpene-indole alkaloid BGC from *Escovopsis* strains A, B, C, E & F. Similarity was assessed according to E value and shared amino acid identities.**

| <i>Escovopsis strain</i>              | Strain A         | Strain B           | Strain C           | Strain D           | Strain E         | Strain F           | Strain G                           |
|---------------------------------------|------------------|--------------------|--------------------|--------------------|------------------|--------------------|------------------------------------|
| <b>Contig</b>                         | SC05             | SC07               | SC05               | SC05               | SC024            | SC10               | LGSR010<br>00002.1                 |
|                                       |                  |                    |                    |                    |                  |                    |                                    |
| <b>Gene name (predicted function)</b> | Strain A         | Strain B           | Strain C           | Strain D           | Strain E         | Strain F           | Strain G<br><b>Gene Identifier</b> |
| EtpT (thioredoxin reductase)          | 324397 to 325642 | 2133685 to 2134931 | 2252891 to 2251641 | 3202227 to 3203420 | 268585 to 269831 | 1574269 to 1575515 | 2232345 to 2231095<br>ESCO_003933  |
| EtpE (cytochrome P450 mono-oxygenase) | 322606 to 320855 | 2131923 to 2130141 | 2254504 to 2256257 | 3199415 to 3197632 | 266791 to 265009 | 1572507 to 1570725 | 2233958 to 2235711<br>ESCO_003934  |
| EtpM (methyl transferase)             | 320487 to 319147 | 2129695 to 2128413 | 2256625 to 2257915 | 3197206 to 3195983 | 264563 to 263276 | 1570279 to 1568992 | 2236079 to 2237369<br>ESCO_003935  |
| EtpA (ABC transporter)                | 313586 to 318100 | 2122708 to 2127241 | 2263511 to 2258997 | 3190085 to 3194823 | 257540 to 262104 | 1563285 to 1567820 | 2242965 to 2238451<br>ESCO_003936  |
| EtpB (cytochrome P450 mono-oxygenase) | 310114 to 312202 | 2119099 to 2121302 | 2267129 to 2264955 | 3186108 to 3188282 | 254012 to 256130 | 1559626 to 1561876 | 2246484 to 2244404<br>ESCO_003937  |
| ORF (unknown)                         | 306645 to 307583 | 2116530 to 2117474 | 2269582 to 2268662 | 3183054 to 3184079 | 251449 to 252387 | 1557063 to 1558001 | 2248934 to 2248014<br>ESCO_003938  |
| ORF (unknown)                         | 306421 to 306002 | 2116300 to 2116082 | 2269806 to 2270264 | 3182743 to 3182519 | 251219 to 251001 | 1556833 to 1556615 | 2249158 to 2249615<br>ESCO_003939  |
| ORF                                   | 301951           | 2111637            | 2274390            | 3177538            | 246518           | 1552178            | 2253731 to                         |

|                                                          |                        |                          |                          |                          |                        |                          |                                          |
|----------------------------------------------------------|------------------------|--------------------------|--------------------------|--------------------------|------------------------|--------------------------|------------------------------------------|
| (unknown)                                                | to<br>301202           | to<br>2110942            | to<br>2275115            | to<br>3176795            | to<br>245823           | to<br>1551483            | 2254456<br>ESCO_00<br>3940               |
| EtpG<br>(glutathione S-<br>transferase)                  | 298625<br>to<br>297739 | 2109705<br>to<br>2108806 | 2276410<br>to<br>2277314 | 3175327<br>to<br>3174437 | 244610<br>to<br>243735 | 1550270<br>to<br>1549395 | 2255743 to<br>2256647<br>ESCO_00<br>3941 |
| EtpK<br>( $\gamma$ -glutamyl<br>cyclo<br>transferase)    | 293170<br>to<br>294157 | 2103671<br>to<br>2104871 | 2281747<br>to<br>2280743 | 3168563<br>to<br>3169394 | 238798<br>to<br>239801 | 1544342<br>to<br>1545461 | 2261031 to<br>2260005<br>ESCO_00<br>3942 |
| EtpP<br>(nonribosomal<br>peptide<br>synthetase)          | 285789<br>to<br>292009 | 2096364<br>to<br>2102596 | 2289078<br>to<br>2282852 | 3161192<br>to<br>3167407 | 231491<br>to<br>237723 | 1537035<br>to<br>1543267 | 2268362 to<br>2262136<br>ESCO_00<br>3943 |
| EtpC<br>(cytochrome<br>P450 mono-<br>oxygenase)          | 283494<br>to<br>282567 | 2094052<br>to<br>2093122 | 2291375<br>to<br>2292302 | 3158664<br>to<br>3157570 | 229174<br>to<br>228244 | 1534726<br>to<br>1533797 | 2270659 to<br>2271586<br>ESCO_00<br>3944 |
| EtpI (PLP-<br>dependent<br>carbon-sulphur<br>bond lyase) | 280748<br>to<br>282358 | 2091214<br>to<br>2092868 | 2294266<br>to<br>2292511 | 3155443<br>to<br>3157194 | 226286<br>to<br>227990 | 1531912<br>to<br>1533543 | 2273419 to<br>2271795<br>ESCO_00<br>3945 |
| EtpN (methyl<br>transferase)                             | 280119<br>to<br>279055 | 2090539<br>to<br>2089447 | 2294895<br>to<br>2295970 | 3154660<br>to<br>3153439 | 225611<br>to<br>224519 | 1531236<br>to<br>1530144 | 2274048 to<br>2275127<br>ESCO_00<br>3946 |

**Supplementary Table 5 | Position of genes and predicted function for the ETP BGCs in the genomes of sequenced *Escovopsis* strains.** The annotated BGC from strain G was given the accession number TPA: BK010420.

| <i>Escovopsis strain</i>                      | Strain G                 | <i>C. virescens</i><br>ETP Cluster | E value                                  | Identities                                                                                       |
|-----------------------------------------------|--------------------------|------------------------------------|------------------------------------------|--------------------------------------------------------------------------------------------------|
| <b>Contig</b>                                 | LGSR01000002.1           | KF496217                           |                                          |                                                                                                  |
|                                               |                          |                                    |                                          |                                                                                                  |
| <b>Gene name<br/>(predicted<br/>function)</b> | <b>Strain G position</b> | <b>Gene Name</b>                   |                                          |                                                                                                  |
|                                               | <b>Gene Identifier</b>   | <b>Gene Identifier</b>             |                                          |                                                                                                  |
| EtpT (thioredoxin reductase)                  | 2232345 to 2231095       | ChaT                               | 8e-125,<br>8e-125,<br>8e-125             | 130/165<br>(79%),<br>83/118<br>(70%),<br>11/22<br>(50%)                                          |
|                                               | ESCO_003933              |                                    |                                          |                                                                                                  |
| EtpE (cytochrome P450 mono-oxygenase)         | 2233958 to 2235711       | ChaE                               | 8e-92,<br>8e-92,<br>8e-92                | 140/389<br>(36%),<br>57/86<br>(66%),<br>38/52<br>(73%)                                           |
|                                               | ESCO_003934              |                                    |                                          |                                                                                                  |
| EtpM (methyl transferase)                     | 2236079 to 2237369       | ChaM                               | 8e-151                                   | 224/351<br>(64%)                                                                                 |
|                                               | ESCO_003935              |                                    |                                          |                                                                                                  |
| EtpA (ABC transporter)                        | 2242965 to 2238451       | ChaA                               | 0.0, 0.0,<br>0.0, 1e-<br>110, 1e-<br>110 | 387/621<br>(62%),<br>77/133<br>(58%),<br>26/38<br>(68%),<br>142/185<br>(77%),<br>59/107<br>(55%) |
|                                               | ESCO_003936              |                                    |                                          |                                                                                                  |
| EtpB (cytochrome P450 mono-oxygenase)         | 2246484 to 2244404       | ChaB                               | 4e-117,<br>4e-117                        | 128/196<br>(65%),<br>82/112<br>(73%)                                                             |
|                                               | ESCO_003937              |                                    |                                          |                                                                                                  |
| EtpG (glutathione S-transferase)              | 2255743 to 2256647       | ChaG                               | 1e-90,<br>1e-90                          | 99/146<br>(68%),<br>62/78<br>(79%)                                                               |
|                                               | ESCO_003941              |                                    |                                          |                                                                                                  |
| EtpK ( $\gamma$ -glutamyl cyclo transferase)  | 2261031 to 2260005       | ChaK                               | 1e-38                                    | 61/91<br>(67%)                                                                                   |
|                                               | ESCO_003942              |                                    |                                          |                                                                                                  |
| EtpP                                          | 2268362 to 2262136       | ChaP                               | 0.0                                      | 1064/2132                                                                                        |

|                                                |                    |      |                              |                                                         |
|------------------------------------------------|--------------------|------|------------------------------|---------------------------------------------------------|
| (nonribosomal peptide synthetase)              | ESCO_003943        |      |                              | (50%)                                                   |
| EtpC (cytochrome P450 mono-oxygenase)          | 2270659 to 2271586 | ChaC | 3e-45,<br>1e-29,<br>1e-29    | 87/204<br>(43%),<br>30/32<br>(94%),<br>27/34<br>(79%)   |
|                                                | ESCO_003944        |      |                              |                                                         |
| EtpI (PLP-dependent carbon-sulphur bond lyase) | 2273419 to 2271795 | ChaI | 2e-140,<br>2e-140,<br>2e-140 | 86/129<br>(67%),<br>92/154<br>(60%),<br>98/164<br>(60%) |
|                                                | ESCO_003945        |      |                              |                                                         |
| EtpN (methyl transferase)                      | 2274048 to 2275127 | ChaN | 2e-98,<br>2e-98              | 142/268<br>(53%),<br>38/59<br>(64%)                     |
|                                                | ESCO_003946        |      |                              |                                                         |

**Supplementary Table 6 | TBLASTN<sup>13</sup> analysis of the nucleotide sequences of the ETP BGC from *C. virescens*<sup>3</sup> and the proteins encoded by ETP BGC from the reference genome of *Escovopsis* strain G. Similarity was assessed according to E value and shared amino acid identities.**

| <i>Escovopsis strain</i>              | Strain G                                  | Strain A                           | E value                                            | Identities                                                                                        | Strain B                           | E value                                            | Identities                                                                                                                               | Strain C                           | E value                                  | Identities                                                                                        | Strain D                           | E value                                                  | Identities                                                                                                        | Strain E                           | E value                                  | Identities                                                                                                                                              | Strain F                           | E value                                      | Identities                                                                                                     |
|---------------------------------------|-------------------------------------------|------------------------------------|----------------------------------------------------|---------------------------------------------------------------------------------------------------|------------------------------------|----------------------------------------------------|------------------------------------------------------------------------------------------------------------------------------------------|------------------------------------|------------------------------------------|---------------------------------------------------------------------------------------------------|------------------------------------|----------------------------------------------------------|-------------------------------------------------------------------------------------------------------------------|------------------------------------|------------------------------------------|---------------------------------------------------------------------------------------------------------------------------------------------------------|------------------------------------|----------------------------------------------|----------------------------------------------------------------------------------------------------------------|
| <b>Contig</b>                         | LGSR01000002.1                            | SC05                               |                                                    |                                                                                                   | SC07                               |                                                    |                                                                                                                                          | SC05                               |                                          |                                                                                                   | SC05                               |                                                          |                                                                                                                   | SC024                              |                                          |                                                                                                                                                         | SC10                               |                                              |                                                                                                                |
| <b>Gene name (predicted function)</b> | <b>Strain G</b><br><b>Gene Identifier</b> | <b>Strain A</b><br><b>position</b> |                                                    |                                                                                                   | <b>Strain B</b><br><b>position</b> |                                                    |                                                                                                                                          | <b>Strain C</b><br><b>position</b> |                                          |                                                                                                   | <b>Strain D</b><br><b>position</b> |                                                          |                                                                                                                   | <b>Strain E</b><br><b>position</b> |                                          |                                                                                                                                                         | <b>Strain F</b><br><b>position</b> |                                              |                                                                                                                |
| EtpT (thioredoxin reductase)          | 2232345 to 2231095<br>ESCO_003933         | 324397 to 325642                   | 5e-109, 2e-84, 3e-16                               | 163/175 (93%), 145/158 (92%), 33/33 (100%)                                                        | 2133685 to 2134931                 | 3e-170, 3e-170, 3e-170                             | 159/163 (98%), 139/143 (97%), 32/33 (97%)                                                                                                | 2252891 to 2251641                 | 4e-174, 4e-174, 4e-174                   | 164/169 (97%), 142/143 (99%), 33/33 (100%)                                                        | 3202227 to 3203420                 | 3e-150, 3e-150, 3e-150                                   | 143/161 (89%), 123/143 (86%), 28/34 (82%)                                                                         | 268585 to 269831                   | 2e-170, 2e-170, 2e-170                   | 159/163 (98%), 139/143 (97%), 32/33 (97%)                                                                                                               | 1574269 to 1575515                 | 3e-170, 3e-170, 3e-170                       | 159/163 (98%), 139/143 (97%), 32/33 (97%)                                                                      |
| EtpE (cytochrome P450 monooxygenase)  | 2233958 to 2235711<br>ESCO_003934         | 322606 to 320855                   | 0.0                                                | 524/547 (96%)                                                                                     | 2131923 to 2130141                 | 0.0, 0.0                                           | 375/392 (96%), 129/136 (95%)                                                                                                             | 2254504 to 2256257                 | 0.0, 0.0                                 | 390/390 (100%), 136/136 (100%)                                                                    | 3199415 to 3197632                 | 0.0, 3e-77                                               | 336/396 (85%), 114/147 (78%)                                                                                      | 266791 to 265009                   | 0.0, 0.0                                 | 376/392 (96%), 128/133 (96%)                                                                                                                            | 1572507 to 1570725                 | 0.0, 0.0                                     | 376/392 (96%), 129/136 (95%)                                                                                   |
| EtpM (methyl transferase)             | 2236079 to 2237369<br>ESCO_003935         | 320487 to 319147                   | 0.0                                                | 399/446 (89%)                                                                                     | 2129695 to 2128413                 | 0.0, 6e-33                                         | 297/331 (90%), 69/73 (95%)                                                                                                               | 2256625 to 2257915                 | 0.0, 4e-34                               | 331/331 (100%), 72/73 (99%)                                                                       | 3197206 to 3195983                 | 2e-172                                                   | 278/388 (72%)                                                                                                     | 264563 to 263276                   | 0.0, 2e-32                               | 297/331 (90%), 69/73 (95%)                                                                                                                              | 1570279 to 1568992                 | 0.0, 2e-32                                   | 297/331 (90%), 69/73 (95%)                                                                                     |
| EtpA (ABC transporter)                | 2242965 to 2238451<br>ESCO_003936         | 313586 to 318100                   | 0.0, 5e-175, 4e-141, 4e-141, 4e-141, 1e-51, 1e-51, | 403/442 (91%), 300/343 (87%), 231/327 (71%), 47/50 (94%), 20/20 (100%), 79/100 (79%), 41/47 (87%) | 2122708 to 2127241                 | 0.0, 0.0, 0.0, 0.0, 0.0, 0.0, 0.0, 0.0, 0.0, 3e-08 | 398/445 (89%), 183/184 (99%), 129/134 (96%), 131/200 (95%), 91/96 (95%), 66/88 (75%), 30/31 (97%), 26/32 (81%), 12/16 (75%), 23/30 (77%) | 2263511 to 2258997                 | 0.0, 1e-172, 1e-172, 8e-36, 8e-36, 2e-31 | 640/721 (89%), 207/228 (91%), 96/96 (100%), 39/39 (100%), 81/100 (81%), 49/52 (94%), 20/20 (100%) | 3190085 to 3194823                 | 0.0, 2e-146, 2e-146, 4e-135, 4e-135, 4e-41, 4e-41, 6e-08 | 390/505 (77%), 181/187 (97%), 92/112 (82%), 121/132 (92%), 133/199 (67%), 60/119 (50%), 39/39 (100%), 20/21 (95%) | 257540 to 262104                   | 0.0, 0.0, 0.0, 0.0, 0.0, 0.0, 0.0, 3e-08 | 397/445 (89%), 183/184 (99%), 128/134 (96%), 131/200 (96%), 131/200 (96%), 92/96 (96%), 66/88 (75%), 30/31 (97%), 26/32 (81%), 12/16 (75%), 23/30 (77%) | 1563285 to 1567820                 | 0.0, 0.0, 8e-173, 1e-14, 1e-14, 9e-14, 3e-08 | 397/445 (89%), 129/134 (96%), 131/200 (96%), 329/489 (67%), 26/32 (81%), 12/16 (75%), 30/31 (97%), 23/30 (77%) |
| EtpB (cytochrome P450 mono-           | 2246484 to 2244404                        | 310114 to                          | 0.0, 0.0                                           | 377/440 (86%),                                                                                    | 2119099 to                         | 2e-                                                | 203/222                                                                                                                                  | 2267129 to                         | 0.0, 0.0,                                | 244/266 (92%),                                                                                    | 3186108 to                         | 2e-141,                                                  | 198/236 (84%),                                                                                                    | 254012 to                          | 3e-147,                                  | 203/222 (91%),                                                                                                                                          | 1559626 to                         | 9e-145,                                      | 200/219 (91%),                                                                                                 |



|                                                 |                       |                        |                                        |                                                                           |                          |                                 |                                                                    |                          |                                                         |                                                                             |                          |                                                |                                                                                              |                        |                               |                                                          |                          |                                  |                                                                             |
|-------------------------------------------------|-----------------------|------------------------|----------------------------------------|---------------------------------------------------------------------------|--------------------------|---------------------------------|--------------------------------------------------------------------|--------------------------|---------------------------------------------------------|-----------------------------------------------------------------------------|--------------------------|------------------------------------------------|----------------------------------------------------------------------------------------------|------------------------|-------------------------------|----------------------------------------------------------|--------------------------|----------------------------------|-----------------------------------------------------------------------------|
| oxygenase)                                      | ESCO_003937           | 312202                 |                                        | 166/234<br>(71%)                                                          | 2121302                  | 146,<br>4e-83<br>4e-83<br>3e-76 | (91%),<br>82/100<br>(82%),<br>71/114<br>(62%),<br>128/134<br>(96%) | 2264955                  | 0.0,<br>2e-<br>79,<br>0.001                             | 141/179<br>(79%),<br>27/28<br>(96%),<br>138/144<br>(96%),<br>11/13<br>(85%) | 3188282                  | 1e-<br>70,<br>5e-55<br>5e-55<br>6e-21<br>6e-21 | 120/137<br>(88%),<br>64/97<br>(66%),<br>49/79<br>(62%),<br>26/30<br>(87%),<br>25/42<br>(60%) | 256130                 | 2e-82<br>2e-82<br>6e-77       | 82/100<br>(82%),<br>70/101<br>(69%),<br>128/134<br>(96%) | 1561876                  | 2e-82<br>2e-82<br>7e-77<br>2e-10 | 82/100<br>(82%),<br>70/101<br>(69%),<br>128/134<br>(96%),<br>27/49<br>(55%) |
| ORF<br>(unknown)                                | 2248934 to<br>2248014 | 306645<br>to<br>307583 | 3e-115                                 | 241/312<br>(77%)                                                          | 2116530<br>to<br>2117474 | 9e-82                           | 184/318<br>(58%)                                                   | 2269582<br>to<br>2268662 | 4e-<br>124                                              | 241/306<br>(79%)                                                            | 3183054<br>to<br>3184079 | 2e-64<br>5e-08                                 | 136/204<br>(67%),<br>15/20<br>(75%)                                                          | 251449<br>to<br>252387 | 6e-85                         | 190/316<br>(60%)                                         | 1557063<br>to<br>1558001 | 6e-85                            | 190/316<br>(60%)                                                            |
|                                                 | ESCO_003938           |                        |                                        |                                                                           |                          |                                 |                                                                    |                          |                                                         |                                                                             |                          |                                                |                                                                                              |                        |                               |                                                          |                          |                                  |                                                                             |
| ORF<br>(unknown)                                | 2249158 to<br>2249615 | 306421<br>to<br>306002 | 5e-35,<br>0.058                        | 54/55<br>(98%), 6/7<br>(86%)                                              | 2116300<br>to<br>2116082 | 1e-31                           | 51/55<br>(93%)                                                     | 2269806<br>to<br>2270264 | 9e-36                                                   | 55/55<br>(100%)                                                             | 3182743<br>to<br>3182519 | 1e-15                                          | 34/56<br>(61%)                                                                               | 251219<br>to<br>251001 | 1e-31                         | 51/55<br>(93%)                                           | 1556833<br>to<br>1556615 | 1e-31                            | 51/55<br>(93%)                                                              |
|                                                 | ESCO_003939           |                        |                                        |                                                                           |                          |                                 |                                                                    |                          |                                                         |                                                                             |                          |                                                |                                                                                              |                        |                               |                                                          |                          |                                  |                                                                             |
| ORF<br>(unknown)                                | 2253731 to<br>2254456 | 301951<br>to<br>301202 | 2e-64<br>8e-59                         | 90/92<br>(98%),<br>86/87<br>(99%)                                         | 2111637<br>to<br>2110942 | 1e-<br>102                      | 156/233<br>(67%)                                                   | 2274390<br>to<br>2275115 | 2e-67<br>1e-59                                          | 93/93<br>(100%),<br>87/87<br>(100%)                                         | 3177538<br>to<br>3176795 | 4e-46<br>6e-44                                 | 69/88<br>(78%),<br>67/89<br>(75%)                                                            | 246518<br>to<br>245823 | 1e-<br>102                    | 156/233<br>(67%)                                         | 1552178<br>to<br>1551483 | 1e-<br>102                       | 156/233<br>(67%)                                                            |
|                                                 | ESCO_003940           |                        |                                        |                                                                           |                          |                                 |                                                                    |                          |                                                         |                                                                             |                          |                                                |                                                                                              |                        |                               |                                                          |                          |                                  |                                                                             |
| EtpG<br>(glutathione S-<br>transferase)         | 2255743 to<br>2256647 | 298625<br>to<br>297739 | 2e-129<br>2e-129<br>2e-129             | 124/126<br>(98%),<br>86/90<br>(96%),<br>24/25<br>(96%)                    | 2109705<br>to<br>2108806 | 4e-<br>159                      | 225/299<br>(75%)                                                   | 2276410<br>to<br>2277314 | 1e-<br>133,<br>1e-<br>133                               | 150/184<br>(82%),<br>89/94<br>(95%)                                         | 3175327<br>to<br>3174437 | 7e-<br>144                                     | 205/296<br>(69%)                                                                             | 244610<br>to<br>243735 | 3e-<br>159                    | 224/291<br>(77%)                                         | 1550270<br>to<br>1549395 | 6e-<br>160                       | 225/291<br>(77%)                                                            |
|                                                 | ESCO_003941           |                        |                                        |                                                                           |                          |                                 |                                                                    |                          |                                                         |                                                                             |                          |                                                |                                                                                              |                        |                               |                                                          |                          |                                  |                                                                             |
| EtpK<br>(γ-glutamyl<br>cyclo<br>transferase)    | 2261031 to<br>2260005 | 293170<br>to<br>294157 | 3e-63,<br>5e-09,<br>1e-08              | 89/90<br>(99%),<br>16/16<br>(100%),<br>18/22<br>(82%)                     | 2103671<br>to<br>2104871 | 2e-61<br>6e-09<br>2e-05         | 88/90<br>(98%),<br>16/16<br>(100%),<br>13/18<br>(72%)              | 2281747<br>to<br>2280743 | 3e-63<br>1e-09<br>9e-09                                 | 89/90<br>(99%),<br>19/22<br>(86%),<br>16/16<br>(100%)                       | 3168563<br>to<br>3169394 | 8e-58<br>3e-05                                 | 82/90<br>(91%),<br>12/14<br>(86%)                                                            | 238798<br>to<br>239801 | 4e-62<br>5e-09<br>2e-05       | 88/90<br>(98%),<br>16/16<br>(100%),<br>13/18<br>(72%)    | 1544342<br>to<br>1545461 | 1e-61<br>6e-09<br>1e-05          | 88/90<br>(98%),<br>16/16<br>(100%),<br>13/22<br>(59%)                       |
|                                                 | ESCO_003942           |                        |                                        |                                                                           |                          |                                 |                                                                    |                          |                                                         |                                                                             |                          |                                                |                                                                                              |                        |                               |                                                          |                          |                                  |                                                                             |
| EtpP<br>(nonribosomal<br>peptide<br>synthetase) | 2268362 to<br>2262136 | 285789<br>to<br>292009 | 0.0, 0.0                               | 1018/1109<br>(92%),<br>900/942<br>(96%)                                   | 2096364<br>to<br>2102596 | 0.0,<br>0.0                     | 954/1166<br>(82%),<br>817/879<br>(93%)                             | 2289078<br>to<br>2282852 | 0.0,<br>0.0                                             | 1038/1109<br>(94%),<br>912/942<br>(97%)                                     | 3161192<br>to<br>3167407 | 0.0                                            | 1484/2088<br>(71%)                                                                           | 231491<br>to<br>237723 | 0.0,<br>0.0                   | 955/1166<br>(82%),<br>821/888<br>(92%)                   | 1537035<br>to<br>1543267 | 0.0,<br>0.0                      | 956/1166<br>(82%),<br>816/879<br>(93%)                                      |
|                                                 | ESCO_003943           |                        |                                        |                                                                           |                          |                                 |                                                                    |                          |                                                         |                                                                             |                          |                                                |                                                                                              |                        |                               |                                                          |                          |                                  |                                                                             |
| EtpC<br>(cytochrome<br>P450 mono-<br>oxygenase) | 2270659 to<br>2271586 | 283494<br>to<br>282567 | 1e-132<br>1e-132,<br>1e-132,<br>1e-132 | 107/109<br>(98%),<br>74/76<br>(97%),<br>41/47<br>(87%),<br>21/24<br>(88%) | 2094052<br>to<br>2093122 | 1e-<br>112,<br>9e-25<br>2e-06   | 171/242<br>(71%),<br>39/47<br>(83%),<br>13/17<br>(76%)             | 2291375<br>to<br>2292302 | 6e-<br>136,<br>6e-<br>136,<br>6e-<br>136,<br>6e-<br>136 | 107/109<br>(98%),<br>77/82<br>(94%),<br>46/47<br>(98%),<br>21/24<br>(88%)   | 3158664<br>to<br>3157570 | 4e-<br>122                                     | 186/332<br>(56%)                                                                             | 229174<br>to<br>228244 | 1e-<br>112,<br>9e-25<br>2e-06 | 171/242<br>(71%),<br>39/47<br>(83%),<br>13/17<br>(76%)   | 1534726<br>to<br>1533797 | 6e-<br>145,<br>8e-06             | 207/313<br>(66%),<br>13/15<br>(87%)                                         |
|                                                 | ESCO_003944           |                        |                                        |                                                                           |                          |                                 |                                                                    |                          |                                                         |                                                                             |                          |                                                |                                                                                              |                        |                               |                                                          |                          |                                  |                                                                             |
| EtpI (PLP-                                      | 2273419 to            | 280748                 | 4e-174,                                | 153/154                                                                   | 2091214                  | 0.0,                            | 293/379                                                            | 2294266                  | 6e-                                                     | 154/154                                                                     | 3155443                  | 0.0                                            | 300/564                                                                                      | 226286                 | 1e-                           | 135/156                                                  | 1531912                  | 0.0                              | 407/543                                                                     |

|                                      |                    |                  |                        |                                           |                    |                                |                                                      |                    |                  |                                        |                    |                            |                                          |                  |                                |                                                      |                    |                             |                                                      |
|--------------------------------------|--------------------|------------------|------------------------|-------------------------------------------|--------------------|--------------------------------|------------------------------------------------------|--------------------|------------------|----------------------------------------|--------------------|----------------------------|------------------------------------------|------------------|--------------------------------|------------------------------------------------------|--------------------|-----------------------------|------------------------------------------------------|
| dependent carbon-sulphur bond lyase) | 2271795            | to 282358        | 4e-174, 3e-87          | (99%), 176/178 (99%),<br>127/129 (98%)    | to 2092868         | 1e-76                          | (77%), 114/129 (88%)                                 | to 2292511         | 107, 2e-99 2e-87 | (100%), 178/178 (100%), 129/129 (100%) | to 3157194         |                            | (53%)                                    | to 227990        | 92, 1e-85 2e-76                | (87%), 159/180 (88%), 114/129 (88%)                  | to 1533543         |                             | (75%)                                                |
|                                      | ESCO_003945        |                  |                        |                                           |                    |                                |                                                      |                    |                  |                                        |                    |                            |                                          |                  |                                |                                                      |                    |                             |                                                      |
| EtpN (methyl transferase)            | 2274048 to 2275127 | 280119 to 279055 | 2e-158, 2e-158, 2e-158 | 155/155 (100%), 92/119 (77%), 38/41 (93%) | 2090539 to 2089447 | 1e-138, 1e-138, 1e-138, 1e-138 | 148/155 (95%), 50/52 (96%), 33/42 (79%), 24/29 (83%) | 2294895 to 2295970 | 5e-162, 5e-162   | 196/223 (88%), 93/116 (80%)            | 3154660 to 3153439 | 3e-116, 3e-116, 116, 1e-19 | 126/156 (81%), 79/127 (62%), 32/41 (78%) | 225611 to 224519 | 1e-138, 1e-138, 1e-138, 1e-138 | 148/155 (95%), 50/52 (96%), 33/42 (79%), 24/29 (83%) | 1531236 to 1530144 | 2e-144, 2e-144, 144, 2e-144 | 147/155 (95%), 62/70 (89%), 33/42 (79%), 24/29 (83%) |
|                                      | ESCO_003946        |                  |                        |                                           |                    |                                |                                                      |                    |                  |                                        |                    |                            |                                          |                  |                                |                                                      |                    |                             |                                                      |

**Supplementary Table 7 | BLASTX<sup>13</sup> analysis of the proteins encoded by the ETP BGC from the reference genome of *Escovopsis* strain G and the nucleotide sequences of the ETP BGC from *Escovopsis* strains A-F. Similarity was assessed according to E value and shared amino acid identities.**

| <i>Escovopsis</i> strain              | Strain A           | Strain B           | Strain C         | Strain D         | Strain E                         | Strain F           | Strain G                        |
|---------------------------------------|--------------------|--------------------|------------------|------------------|----------------------------------|--------------------|---------------------------------|
| <b>Contig</b>                         | SC08               | SC03               | SC06             | SC10             | SC020                            | SC02               | LGSR0100019.1                   |
|                                       |                    |                    |                  |                  |                                  |                    |                                 |
| <b>Gene name (predicted function)</b> | <b>Strain A</b>    | <b>Strain B</b>    | <b>Strain C</b>  | <b>Strain D</b>  | <b>Strain E</b>                  | <b>Strain F</b>    | <b>Strain G</b>                 |
|                                       |                    |                    |                  |                  |                                  |                    | <b>Gene Identifier</b>          |
| ORF (unknown)                         | 1337019 to 1337533 | 3152647 to 3153166 | 130574 to 130060 | 108840 to 108284 | 278762 to 278244                 | 2895728 to 2896247 | 910902 to 911416<br>ESCO_005789 |
| ORF (unknown)                         | 1339235 - 1339769  | n/a                | 128398-127966    | n/a              | n/a                              | n/a                | 913079 to 913511<br>ESCO_005790 |
| ORF (unknown)                         | 1342103 to 1340090 | 3157964 to 3155949 | 125471 to 127475 | 105348 to 107505 | 273445 to 275460                 | 2901048 to 2899033 | 916006 to 914002<br>ESCO_005791 |
| EmoH (decarboxylase)                  | 1343633 to 1343074 | 3160231 to 3159620 | 124163 to 124723 | 102658 to 103255 | 271134 to 271789                 | 2903362 to 2902705 | 917314 to 916754<br>ESCO_005792 |
| EmoM (mono-oxygenase)                 | 1344567 to 1345240 | 3161185 to 3161851 | 123221 to 122548 | 101299 to 100640 | 270187 to 269522                 | 2904316 to 2904982 | 918256 to 918929<br>ESCO_005793 |
| EmoF (hydrolase)                      | 1346355 to 1345457 | 3162974 to 3162072 | 121433 to 122331 | 99512 to 100439  | 268399 to 269301                 | 2906105 to 2905203 | 920044 to 919146<br>ESCO_005794 |
| EmoG (polyketide synthase)            | 1347475 to 1352937 | 3164091 to 3169553 | 120312 to 114839 | 98335 to 92840   | 267282 to ? (stop codon unclear) | 2907222 to 2912684 | 921165 to 926638<br>ESCO_005795 |
| ORF (unknown)                         | 1358116 to         | 3174683 to         | 109708 to        | 87806 to ? (stop | 258204 to                        | 2917808 to         | 931768 to 930709                |

|  |         |         |        |                   |        |         |                 |
|--|---------|---------|--------|-------------------|--------|---------|-----------------|
|  | 1357058 | 3173618 | 110768 | codon<br>unclear) | 259269 | 2916743 | ESCO_0057<br>96 |
|--|---------|---------|--------|-------------------|--------|---------|-----------------|

**Supplementary Table 8 | Position of genes and predicted function for the emodin (8) BGC in the genomes of sequenced *Escovopsis* strains.** The annotated cluster from strain G was given the accession number TPA: BK010419.

| <b><i>Escovopsis</i> strain</b>       | Strain G                 | <i>A. nidulans</i> monodictyphenone Cluster   | E value     | Identities                     |
|---------------------------------------|--------------------------|-----------------------------------------------|-------------|--------------------------------|
| <b>Contig</b>                         | LGSR01000019.1           | chromosome: CADRE2:<br>VIII:4354659:4456428:1 |             |                                |
|                                       |                          |                                               |             |                                |
| <b>Gene name (predicted function)</b> | <b>Strain G position</b> | <b>Gene Name</b>                              |             |                                |
|                                       | <b>Gene Identifier</b>   | <b>Gene Identifier</b>                        |             |                                |
| EmoH (decarboxylase)                  | 917314 to 916754         | MdpH                                          | 1e-58, 0.36 | 77/143 (54%),<br>24/126 (19%)  |
|                                       | ESCO_005792              | ANIA_10022                                    |             |                                |
| EmoF (hydrolase)                      | 920044 to 919146         | MdpF                                          | 1e-118      | 163/271 (60%)                  |
|                                       | ESCO_005794              | ANIA_00149                                    |             |                                |
| EmoG (polyketide synthase)            | 921165 to 926638         | MdpG                                          | 0.0, 4e-30  | 910/1582 (58%),<br>56/74 (76%) |
|                                       | ESCO_005795              | ANIA_00150                                    |             |                                |

**Supplementary Table 9 | BLASTP<sup>13</sup> analysis of the proteins encoded by the monodictyphenone BGC, that makes emodin, from *A. nidulans*<sup>4</sup> and the reference genome of *Escovopsis* strain G. Similarity was assessed according to E value and shared amino acid identities.**

| <i>Escovopsis</i> strain              | Strain G               | Strain A                 | E value             | Identities                                  | Strain B                 | E value             | Identities                            | Strain C                 | E value                 | Identities                                   | Strain D                 | E value             | Identities                                              | Strain E                         | E value          | Identities                            | Strain F                 | E value          | Identities                            |
|---------------------------------------|------------------------|--------------------------|---------------------|---------------------------------------------|--------------------------|---------------------|---------------------------------------|--------------------------|-------------------------|----------------------------------------------|--------------------------|---------------------|---------------------------------------------------------|----------------------------------|------------------|---------------------------------------|--------------------------|------------------|---------------------------------------|
| <b>Contig</b>                         | LGSR01000019.1         | SC08                     |                     |                                             | SC03                     |                     |                                       | SC06                     |                         |                                              | SC10                     |                     |                                                         | SC020                            |                  |                                       | SC02                     |                  |                                       |
|                                       |                        |                          |                     |                                             |                          |                     |                                       |                          |                         |                                              |                          |                     |                                                         |                                  |                  |                                       |                          |                  |                                       |
| <b>Gene name (predicted function)</b> | <b>Strain G</b>        | <b>Strain A position</b> |                     |                                             | <b>Strain B position</b> |                     |                                       | <b>Strain C position</b> |                         |                                              | <b>Strain D position</b> |                     |                                                         | <b>Strain E position</b>         |                  |                                       | <b>Strain F position</b> |                  |                                       |
|                                       | <b>Gene Identifier</b> |                          |                     |                                             |                          |                     |                                       |                          |                         |                                              |                          |                     |                                                         |                                  |                  |                                       |                          |                  |                                       |
| ORF (unknown)                         | 910902 to 911416       | 1337019 to 1337533       | 5e-73, 73           | 102/105 (97%), 44/46 (96%)                  | 3152647 to 3153166       | 8e-72, 1e-15        | 94/103 (91%), 43/46 (93%)             | 130574 to 130060         | 3e-78, 9e-17            | 102/105 (97%), 45/46 (98%)                   | 108840 to 108284         | 5e-51, 3e-06        | 71/111 (64%), 14/29 (48%)                               | 278762 to 278244                 | 3e-88            | 137/172 (80%)                         | 2895728 to 2896247       | 3e-88            | 137/172 (80%)                         |
|                                       | ESCO_005789            |                          |                     |                                             |                          |                     |                                       |                          |                         |                                              |                          |                     |                                                         |                                  |                  |                                       |                          |                  |                                       |
| ORF (unknown)                         | 913079 to 913511       | 1339235-1339769          | 9e-37, 2e-32        | 58/76 (76%), 50/51 (98%)                    | n/a                      | n/a                 | n/a                                   | 128398-127966            | 5e-58, 5e-58            | 59/63 (94%), 51/51 (100%)                    | n/a                      | n/a                 | n/a                                                     | n/a                              | n/a              | n/a                                   | n/a                      | n/a              | n/a                                   |
|                                       | ESCO_005790            |                          |                     |                                             |                          |                     |                                       |                          |                         |                                              |                          |                     |                                                         |                                  |                  |                                       |                          |                  |                                       |
| ORF (unknown)                         | 916006 to 914002       | 1342103 to 1340090       | 0.0, 0.0, 0.0       | 311/314 (99%), 138/176 (78%), 111/112 (99%) | 3157964 to 3155949       | 0.0,                | 507/651 (78%)                         | 125471 to 127475         | 0.0, 0.0, 0.0           | 313/314 (99%), 138/175 (79%), 112/112 (100%) | 105348 to 107505         | 0.0, 0.0, 0.0       | 168/246 (68%), 153/203 (75%), 84/116 (72%), 23/48 (48%) | 273445 to 275460                 | 0.0              | 507/651 (78%)                         | 2901048 to 2899033       | 0.0              | 507/651 (78%)                         |
|                                       | ESCO_005791            |                          |                     |                                             |                          |                     |                                       |                          |                         |                                              |                          |                     |                                                         |                                  |                  |                                       |                          |                  |                                       |
| EmoH (decarboxylase)                  | 917314 to 916754       | 1343633 to 1343074       | 2e-90, 7e-11        | 124/152 (82%), 20/20 (100%)                 | 3160231 to 3159620       | 4e-92               | 134/203 (66%)                         | 124163 to 124723         | 8e-47, 4e-44, 2e-11     | 65/73 (89%), 64/89 (72%), 20/20 (100%)       | 102658 to 103255         | 5e-42, 1e-34        | 64/105 (61%), 51/78 (65%)                               | 271134 to 271789                 | 4e-83, 7e-11     | 115/152 (76%), 20/20 (100%)           | 2903362 to 2902705       | 4e-83, 7e-11     | 115/152 (76%), 20/20 (100%)           |
|                                       | ESCO_005792            |                          |                     |                                             |                          |                     |                                       |                          |                         |                                              |                          |                     |                                                         |                                  |                  |                                       |                          |                  |                                       |
| EmoM (mono-oxygenase)                 | 918256 to 918929       | 1344567 to 1345240       | 4e-97, 2e-24        | 151/152 (99%), 41/41 (100%)                 | 3161185 to 3161851       | 2e-68, 2e-21        | 145/173 (84%), 37/41 (90%)            | 123221 to 122548         | 6e-98, 2e-24            | 152/152 (100%), 41/41 (100%)                 | 101299 to 100640         | 1e-103              | 142/219 (65%)                                           | 270187 to 269522                 | 9e-89            | 177/221 (80%)                         | 2904316 to 2904982       | 9e-89            | 177/221 (80%)                         |
|                                       | ESCO_005793            |                          |                     |                                             |                          |                     |                                       |                          |                         |                                              |                          |                     |                                                         |                                  |                  |                                       |                          |                  |                                       |
| EmoF (hydrolase)                      | 920044 to 919146       | 1346355 to 1345457       | 0.0, 6e-07          | 254/259 (98%), 15/15 (100%)                 | 3162974 to 3162072       | 0.0                 | 258/300 (86%)                         | 121433 to 122331         | 0.0, 5e-07              | 258/259 (99%), 15/15 (100%)                  | 99512 to 100439          | 4e-144, 2e-05       | 204/262 (78%), 11/15 (73%)                              | 268399 to 269301                 | 0.0              | 258/300 (86%)                         | 2906105 to 2905203       | 0.0              | 258/300 (86%)                         |
|                                       | ESCO_005794            |                          |                     |                                             |                          |                     |                                       |                          |                         |                                              |                          |                     |                                                         |                                  |                  |                                       |                          |                  |                                       |
| EmoG (polyketide synthase)            | 921165 to 926638       | 1347475 to 1352937       | 0.0, 9e-134, 2e-30, | 1198/1258 (95%), 210/212 (99%), 56/57       | 3164091 to 3169553       | 0.0, 7e-122, 9e-39, | 1127/1266 (89%), 191/204 (94%), 70/76 | 120312 to 114839         | 0.0, 4e-135, 9e-31, 2e- | 1218/1258 (97%), 212/212 (100%), 57/57       | 98335 to 92840           | 0.0, 4e-104, 7e-21, | 971/1288 (75%), 162/212 (76%), 39/46                    | 267282 to ? (stop codon unclear) | 0.0, 2e-120, 3e- | 1124/1266 (89%), 190/204 (93%), 43/48 | 2907222 to 2912684       | 0.0, 7e-117, 1e- | 1124/1266 (89%), 190/204 (93%), 43/48 |
|                                       | ESCO_005795            |                          |                     |                                             |                          |                     |                                       |                          |                         |                                              |                          |                     |                                                         |                                  |                  |                                       |                          |                  |                                       |

|               |                  |                          |                  |                                       |                          |                  |                                       |                        |     |                            |                                                                        |                  |                                      |                          |                  |                                       |                          |                  |                                       |
|---------------|------------------|--------------------------|------------------|---------------------------------------|--------------------------|------------------|---------------------------------------|------------------------|-----|----------------------------|------------------------------------------------------------------------|------------------|--------------------------------------|--------------------------|------------------|---------------------------------------|--------------------------|------------------|---------------------------------------|
|               |                  |                          | 1e-22            | (98%),<br>54/100<br>(54%)             |                          | 3e-23,           | (92%),<br>43/48<br>(90%)              |                        | 23  | (100%),<br>55/100<br>(55%) |                                                                        | 2e-12            | (85%),<br>26/47<br>(55%)             | 262078<br>was<br>assumed | 23               | (90%)                                 |                          | 20               | (90%)                                 |
| ORF (unknown) | 931768 to 930709 | 1358116<br>to<br>1357058 | 6e-143,<br>2e-73 | 191/201<br>(95%),<br>106/111<br>(95%) | 3174683<br>to<br>3173618 | 2e-137,<br>4e-71 | 182/196<br>(93%),<br>100/111<br>(90%) | 109708<br>to<br>110768 | 0.0 | 295/322<br>(92%)           | 87806<br>to ?<br>(stop<br>codon<br>unclear)<br>88799<br>was<br>assumed | 4e-111,<br>5e-60 | 163/210<br>(78%),<br>83/107<br>(78%) | 258204<br>to<br>259269   | 4e-138,<br>4e-71 | 183/196<br>(93%),<br>100/111<br>(90%) | 2917808<br>to<br>2916743 | 4e-138,<br>4e-71 | 183/196<br>(93%),<br>100/111<br>(90%) |

**Supplementary Table 10 | BLASTX<sup>13</sup> analysis of the proteins encoded by the emodin BGC from the reference genome of *Escovopsis* strain G and the nucleotide sequences of the emodin BGC from *Escovopsis* strains A-F. Similarity was assessed according to E value and shared amino acid identities.**

|                        |               |               |               |               |               |               |               |
|------------------------|---------------|---------------|---------------|---------------|---------------|---------------|---------------|
| <b>Strain_sequence</b> | <b>A_tef1</b> | <b>B_tef1</b> | <b>C_tef1</b> | <b>D_tef1</b> | <b>E_tef1</b> | <b>F_tef1</b> | <b>G_tef1</b> |
| <b>A_tef1</b>          | 100.00        | 96.70         | 98.29         | 88.65         | 96.70         | 96.70         | 98.28         |
| <b>B_tef1</b>          | 96.70         | 100.00        | 96.31         | 88.26         | 100.00        | 100.00        | 96.31         |
| <b>C_tef1</b>          | 98.29         | 96.31         | 100.00        | 88.52         | 96.31         | 96.31         | 100.00        |
| <b>D_tef1</b>          | 88.65         | 88.26         | 88.52         | 100.00        | 88.26         | 88.26         | 88.52         |
| <b>E_tef1</b>          | 96.70         | 100.00        | 96.31         | 88.26         | 100.00        | 100.00        | 96.31         |
| <b>F_tef1</b>          | 96.70         | 100.00        | 96.31         | 88.26         | 100.00        | 100.00        | 96.31         |
| <b>G_tef1</b>          | 98.28         | 96.31         | 100.00        | 88.52         | 96.31         | 96.31         | 100.00        |
| <b>Strain_sequence</b> | <b>A_ITS</b>  | <b>B_ITS</b>  | <b>C_ITS</b>  | <b>D_ITS</b>  | <b>E_ITS</b>  | <b>F_ITS</b>  |               |
| <b>A_ITS</b>           | 100.00        | 95.80         | 99.27         | 86.35         | 95.80         | 95.80         |               |
| <b>B_ITS</b>           | 95.80         | 100.00        | 95.80         | 86.90         | 100.00        | 100.00        |               |
| <b>C_ITS</b>           | 99.27         | 95.80         | 100.00        | 86.35         | 95.80         | 95.80         |               |
| <b>D_ITS</b>           | 86.35         | 86.90         | 86.35         | 100.00        | 86.90         | 86.90         |               |
| <b>E_ITS</b>           | 95.80         | 100.00        | 95.80         | 86.90         | 100.00        | 100.00        |               |
| <b>F_ITS</b>           | 95.80         | 100.00        | 95.80         | 86.90         | 100.00        | 100.00        |               |

**Supplementary Table 11 | Percentage Identity Matrix for partial alignment of the nucleotide sequences for the elongation factor 1-alpha gene (*tef1*) and for the internal transcriber spacer (ITS).**



| <b>Name</b>    | <b>Sequence</b>             | <b>Reference</b> |
|----------------|-----------------------------|------------------|
| <b>18S 1A</b>  | AAC CTG GTT GAT CCT GCC AGT | <b>14</b>        |
| <b>18S 564</b> | GGC ACC AGA CTT GCC CTC     | <b>14</b>        |
| <b>ITS1</b>    | TCC GTA GGT GAA CCT GCG G   | <b>7</b>         |
| <b>ITS4</b>    | TCC TCC GCT TAT TGA TAT GC  | <b>7</b>         |

**Supplementary Table 12 | Oligonucleotides used in this work.**

| Analyte            | Precursor ion (m/z) | Cone voltage (V) | Product ion (m/z) | Collision energy (V) | Dwell time (msec) |
|--------------------|---------------------|------------------|-------------------|----------------------|-------------------|
| shearinine D (2)   | 600.4               | 40               | 210.2             | 50                   | 25                |
|                    |                     |                  | 238.2             | 38                   | 25                |
|                    |                     |                  | 484.3             | 30                   | 25                |
|                    |                     |                  | 542.4             | 18                   | 25                |
| melinacidin IV (1) | 729.1               | 36               | 185.1             | 34                   | 25                |
|                    |                     |                  | 282.1             | 28                   | 25                |
|                    |                     |                  | 300.2             | 34                   | 25                |
|                    |                     |                  | 647.2             | 18                   | 25                |
| yohimbine          | 355.3               | 98               | 162.1             | 30                   | 22                |
|                    |                     |                  | 194.2             | 30                   | 22                |
|                    |                     |                  | 212.2             | 22                   | 22                |
|                    |                     |                  | 224.2             | 22                   | 22                |

**Supplementary Table 13 | Mass transitions used in the MRM method for MS/MS based quantitation of melinacidin IV (1) and shearinine D (2); internal standard: yohimbine.**

**Supplementary Note 1** | Chemical characterization of Melinacidin IV (**1**):  $^1\text{H}$  NMR ( $\text{DMSO-d}_6$ , 400 MHz)  $\delta$  7.71 (2H, d,  $J = 7.6$  Hz), 7.03 (2H, td,  $J = 7.6$  Hz,  $J = 0.8$  Hz), 6.71 (2H, s), 6.65 (dd,  $J = 7.6$  Hz,  $J = 0.8$  Hz), 6.54 (2H, d,  $J = 7.8$  Hz), 6.51 (2H, d,  $J = 4.2$  Hz), 5.82 (2H, m), 5.26 (2H, s), 4.88 (2H, s), 4.21 (2H, dd,  $J = 12.6$  Hz,  $J = 3.0$ ), 4.06 (2H, d,  $J = 12.6$  Hz,  $J = 4.3$ ), 3.00 (6H, s); HR-ESI-MS:  $m/z$  calculated for:  $\text{C}_{30}\text{H}_{29}\text{N}_6\text{O}_8\text{S}_4$ : 729.0924; observed: 729.0937  $[\text{M}+\text{H}]^+$ ;  $\Delta = 1.78$  ppm;  $\text{MS}^2$ : 729.1 > 665.1, 729.1 > 647.1, 729.1 > 481.1; UV/Vis (MeOH):  $\lambda_{\text{max}} = 210, 240, 301$  nm. Analytical data are in full agreement with literature values<sup>15</sup>.

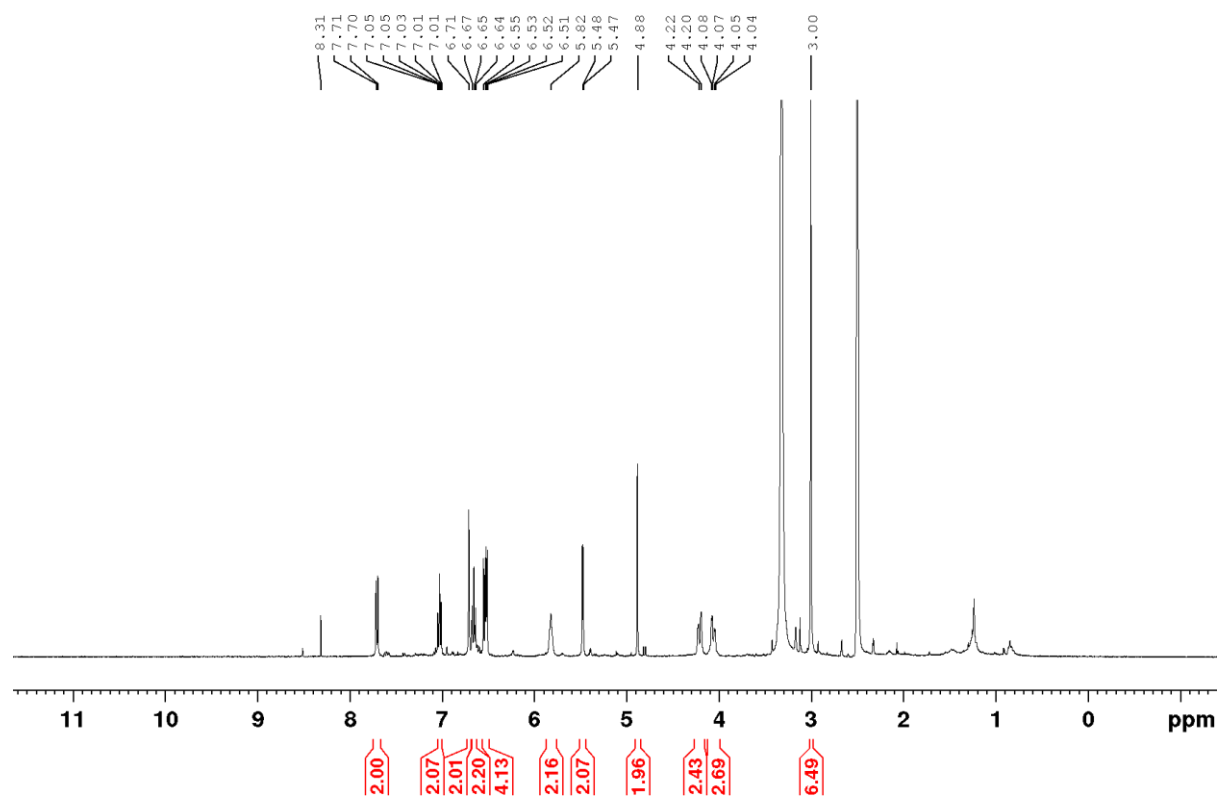

**Supplementary Figure 14** |  $^1\text{H}$  NMR spectrum ( $\text{DMSO-d}_6$ , 400 MHz) of compound **1**

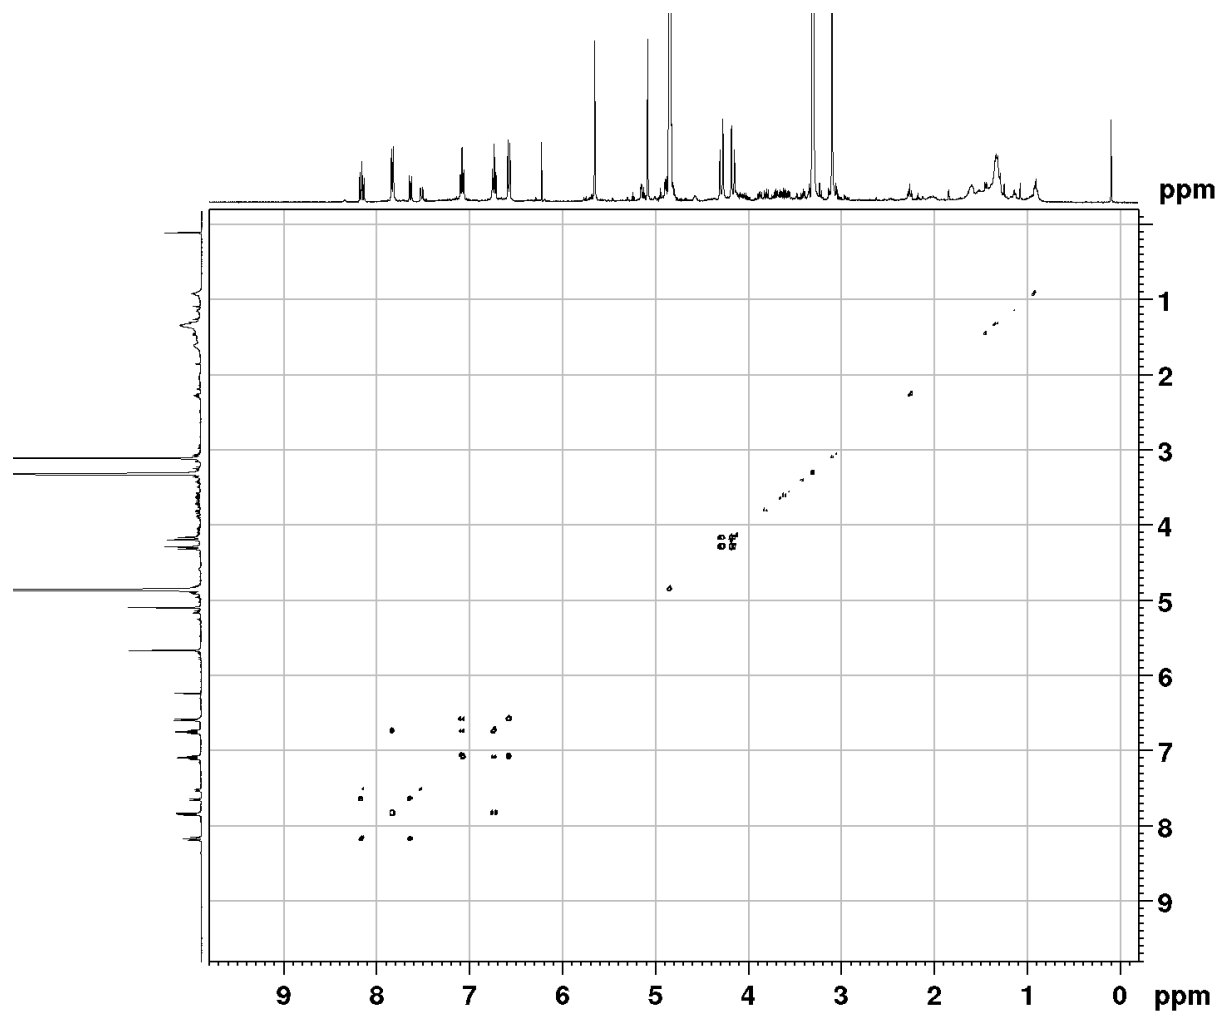

Supplementary Figure 15 | COSY spectrum (MeOD, 400 MHz) of compound 1

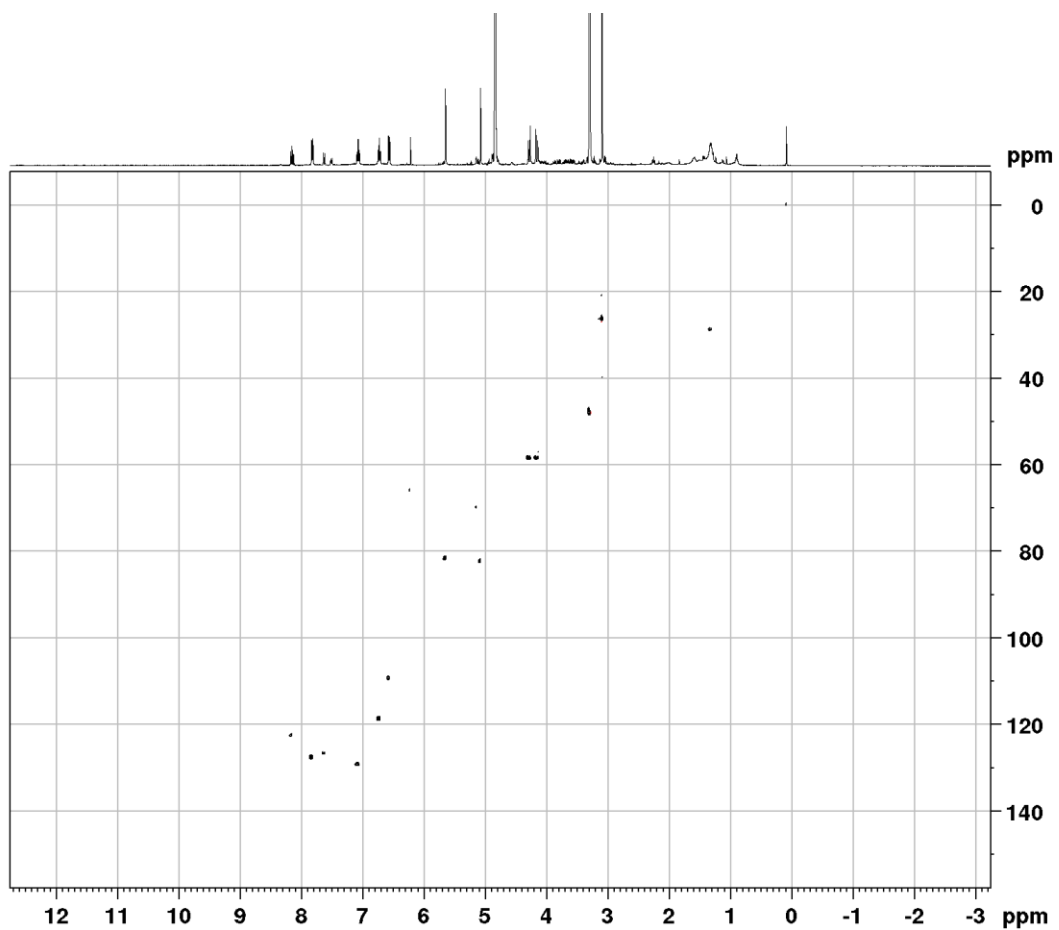

**Supplementary Figure 16 | HSQC spectrum (MeOD, 400 MHz) of compound 1**

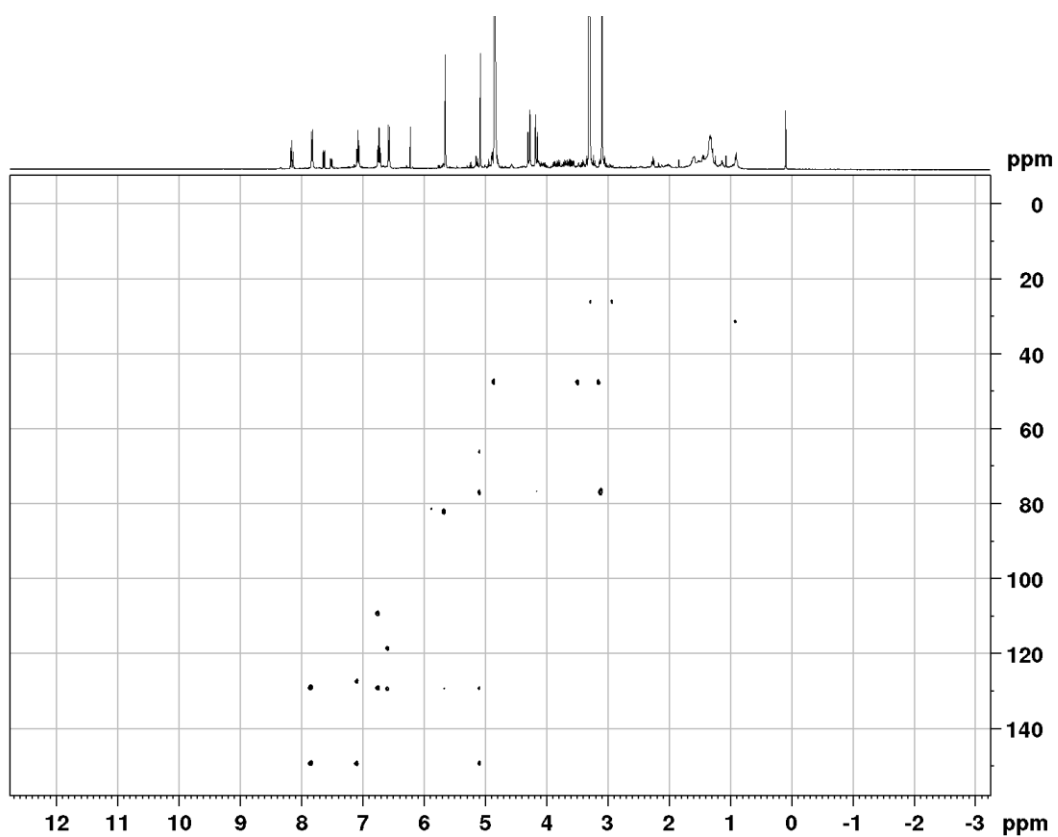

**Supplementary Figure 17 | HMBC spectrum (MeOD, 400 MHz) of compound 1**

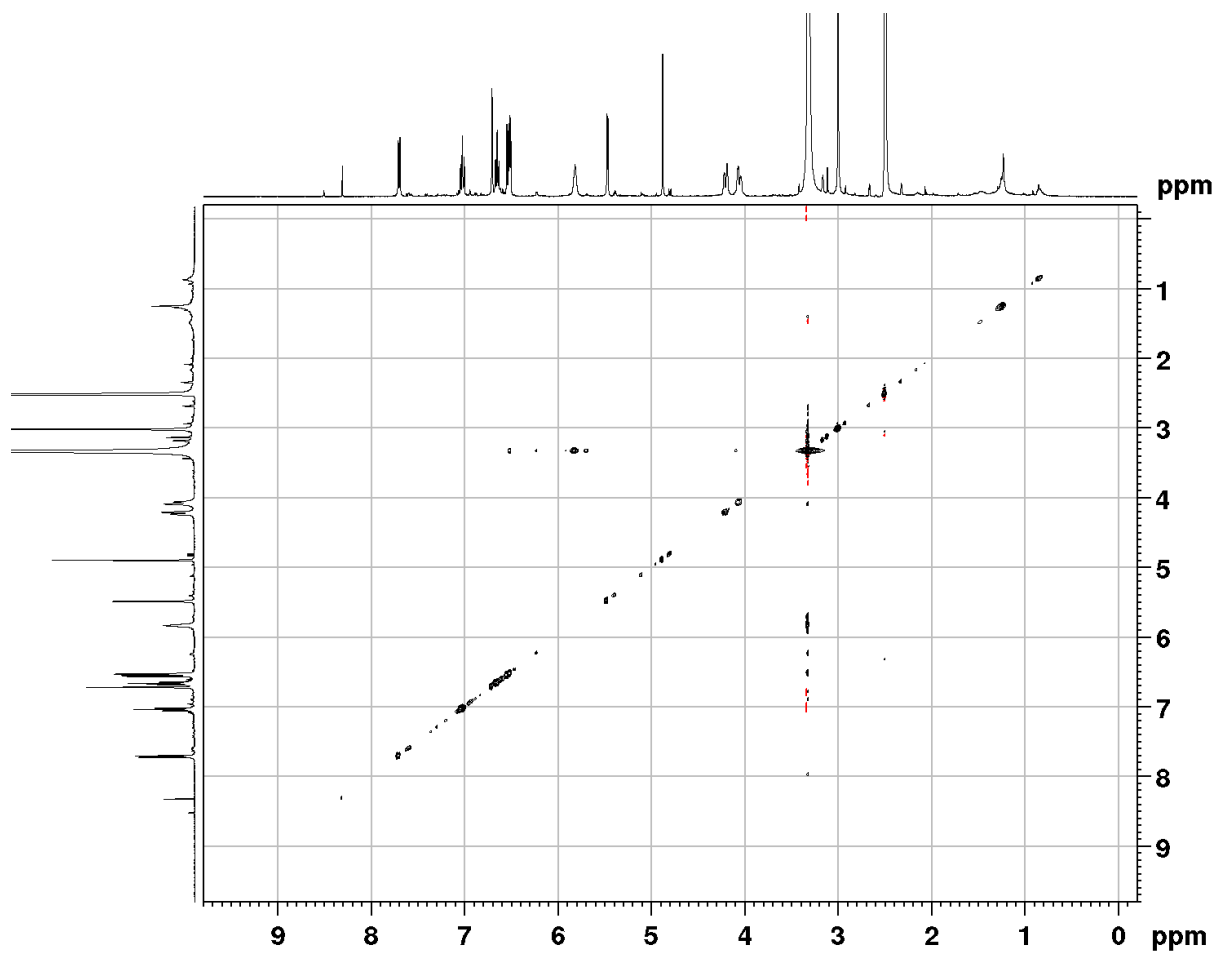

Supplementary Figure 18 | NOESY NMR spectrum (DMSO-d<sub>6</sub>, 400 MHz) of compound 1

**Supplementary Note 2** | Chemical characterization of shearinine D (**2**):  $^1\text{H}$  NMR ( $\text{CDCl}_3$ , 400 MHz)  $\delta$  7.47 (1H, s), 7.33 (1H, m), 5.95 (1H, d,  $J = 2.9$  Hz), 5.83 (1H, m), 4.95 (1H, m) 4.30 (1H, d,  $J = 1.2$  Hz), 2.63-2.85 (5H, m), 2.42 (1H, dd,  $J = 13.0$  Hz,  $J = 10.6$  Hz), 1.95-2.08 (4H, m), 1.76-1.91 (2H, m) 1.52 (3H, s), 1.48 (3H, s) 1.43 (3H, s), 1.37 (3H, s), 1.34 (3H, s), 1.33 (3H, s), 1.22 (3H, s), 1.17 (3H, s), 1.10 (3H, s);  $^{13}\text{C}$  NMR ( $\text{CDCl}_3$ , 100 MHz)  $\delta$  197.0, 169.5, 153.8, 141.0, 138.6, 135.1, 131.8, 126.8, 120.9, 117.7, 117.5, 113.9, 104.3, 102.6, 88.0, 78.8, 77.7, 76.5, 73.8, 72.4, 60.1, 51.7, 48.5, 39.9, 33.9, 31.9, 30.0, 29.8, 28.8, 28.2, 27.5, 27.0, 23.6, 23.1, 23.0, 21.1, 16.1 ppm; HR-ESI-MS:  $m/z$  calculated for:  $\text{C}_{37}\text{H}_{46}\text{NO}_6$ : 600.3320; observed: 600.3340  $[\text{M}+\text{H}]^+$ :  $\Delta = 3.33$  ppm; UV/Vis (MeOH):  $\lambda_{\text{max}} = 210, 236, 258, 330$  nm;  $[\alpha]_{\text{D}} +26^\circ$ , ( $c = 0.05, \text{CHCl}_3$ ). Analytical data are in full agreement with literature values <sup>16</sup>.

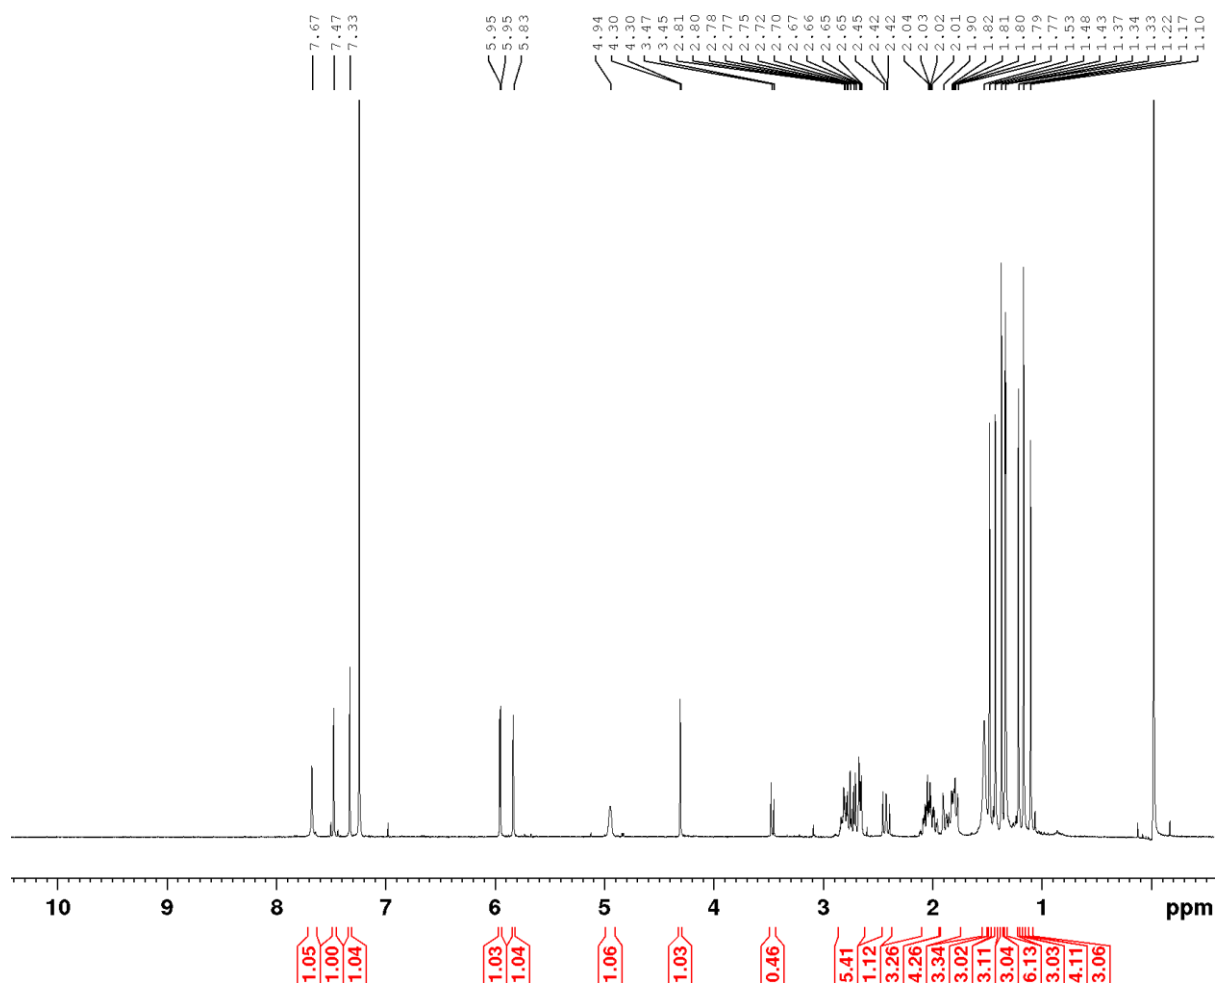

**Supplementary Figure 19** |  $^1\text{H}$  NMR spectrum ( $\text{CDCl}_3$ , 400 MHz) of compound **2**



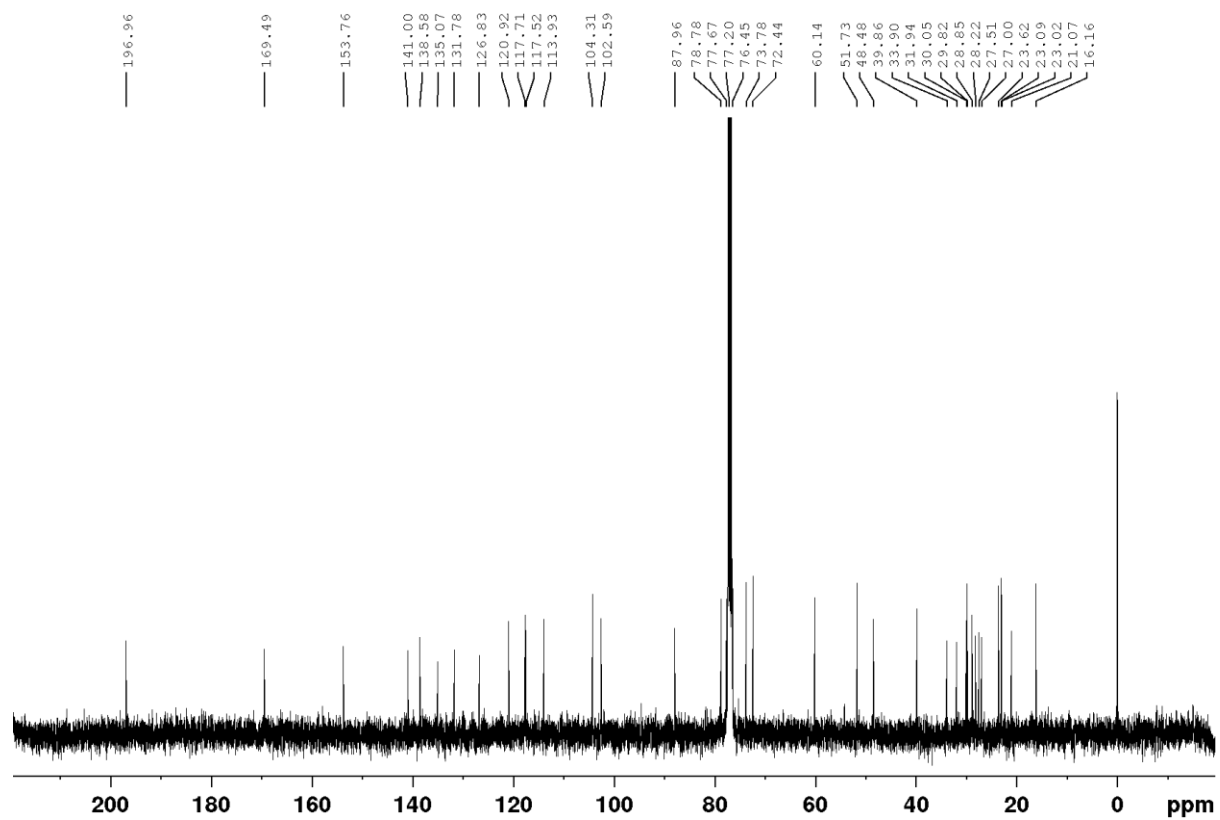

Supplementary Figure 20 | <sup>13</sup>C NMR spectrum (CDCl<sub>3</sub>, 100 MHz) of compound 2

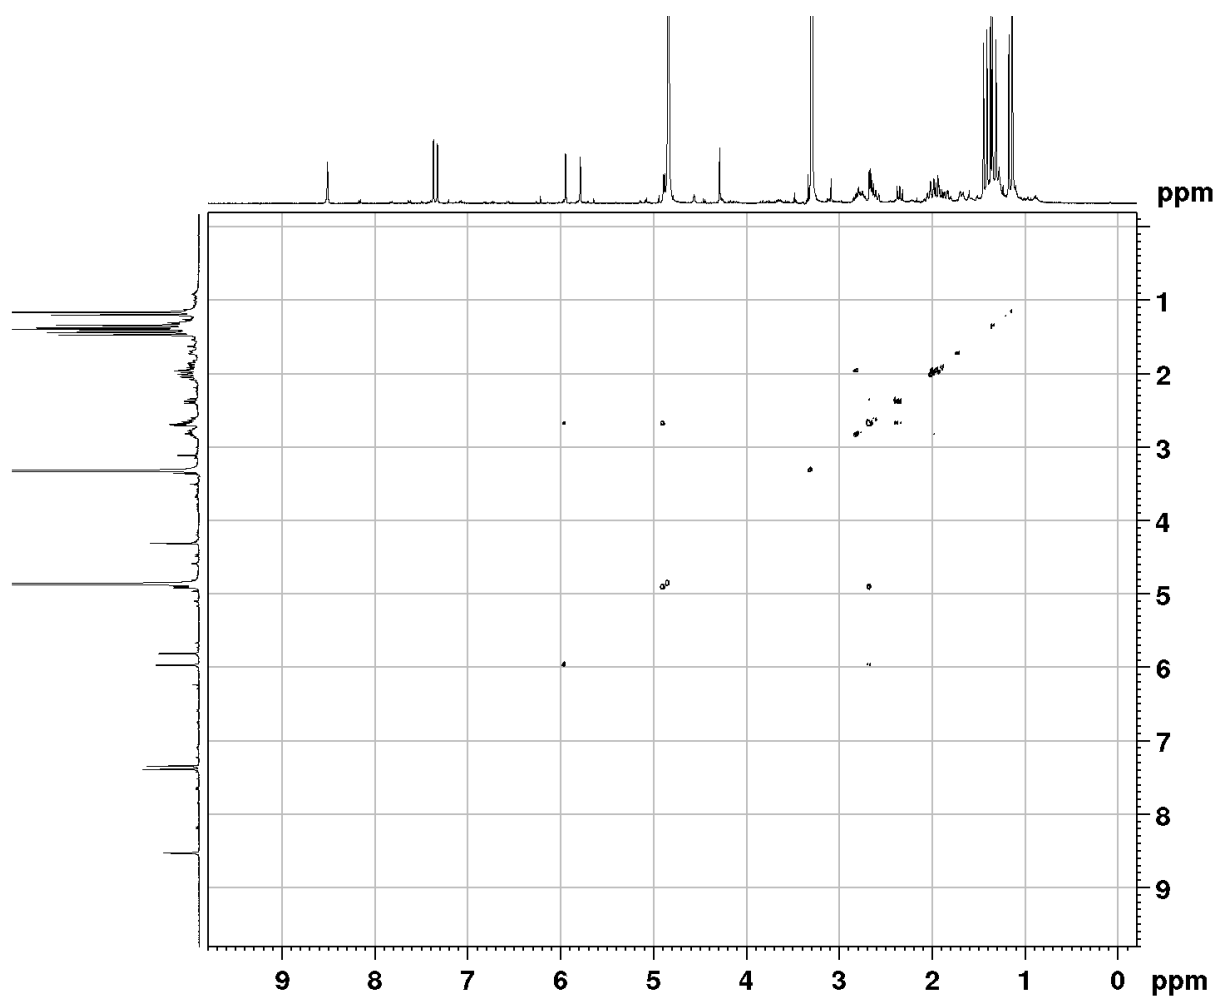

**Supplementary Figure 21 | COSY NMR spectrum (MeOD, 400 MHz) of compound 2**

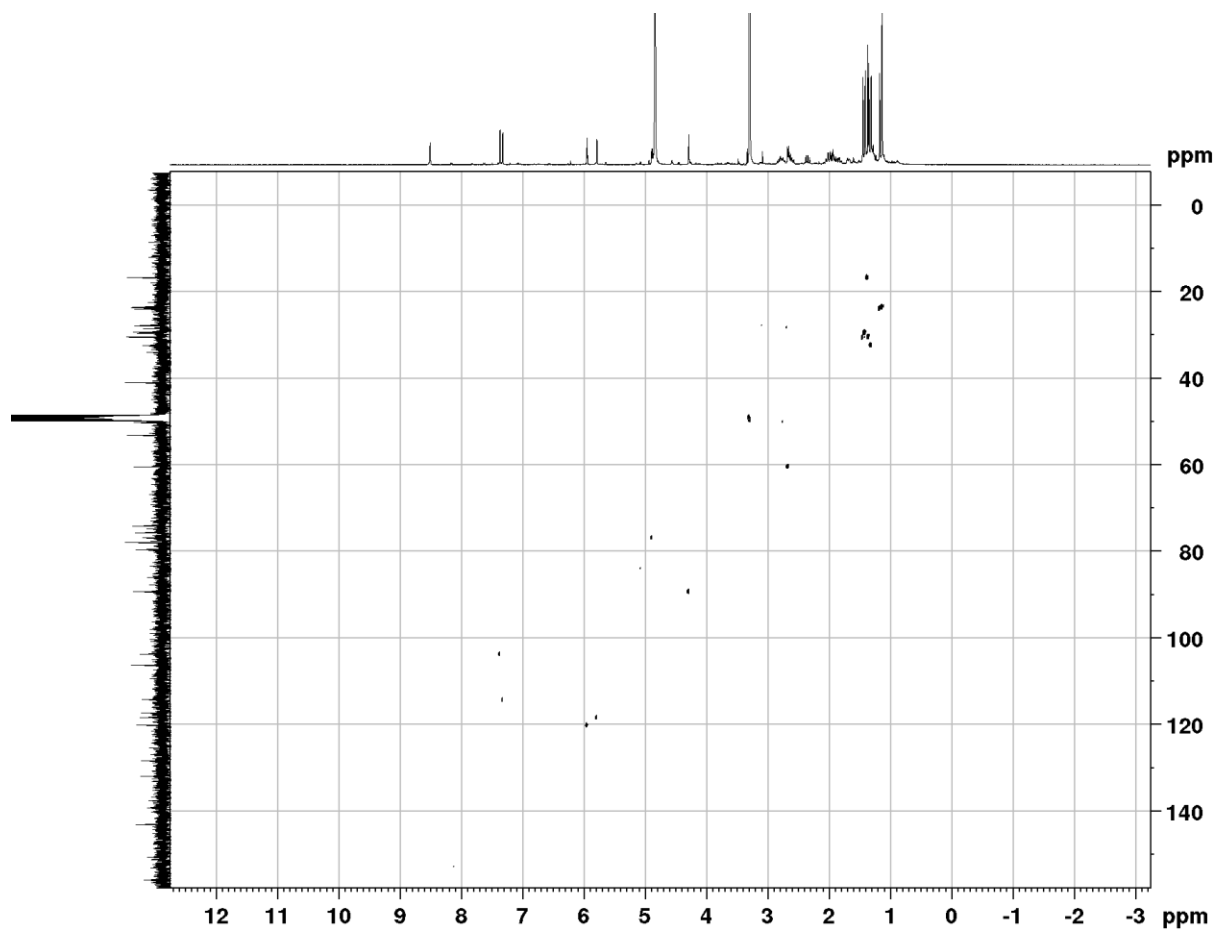

Supplementary Figure 22 | HSQC NMR spectrum (MeOD, 400 MHz) of compound 2

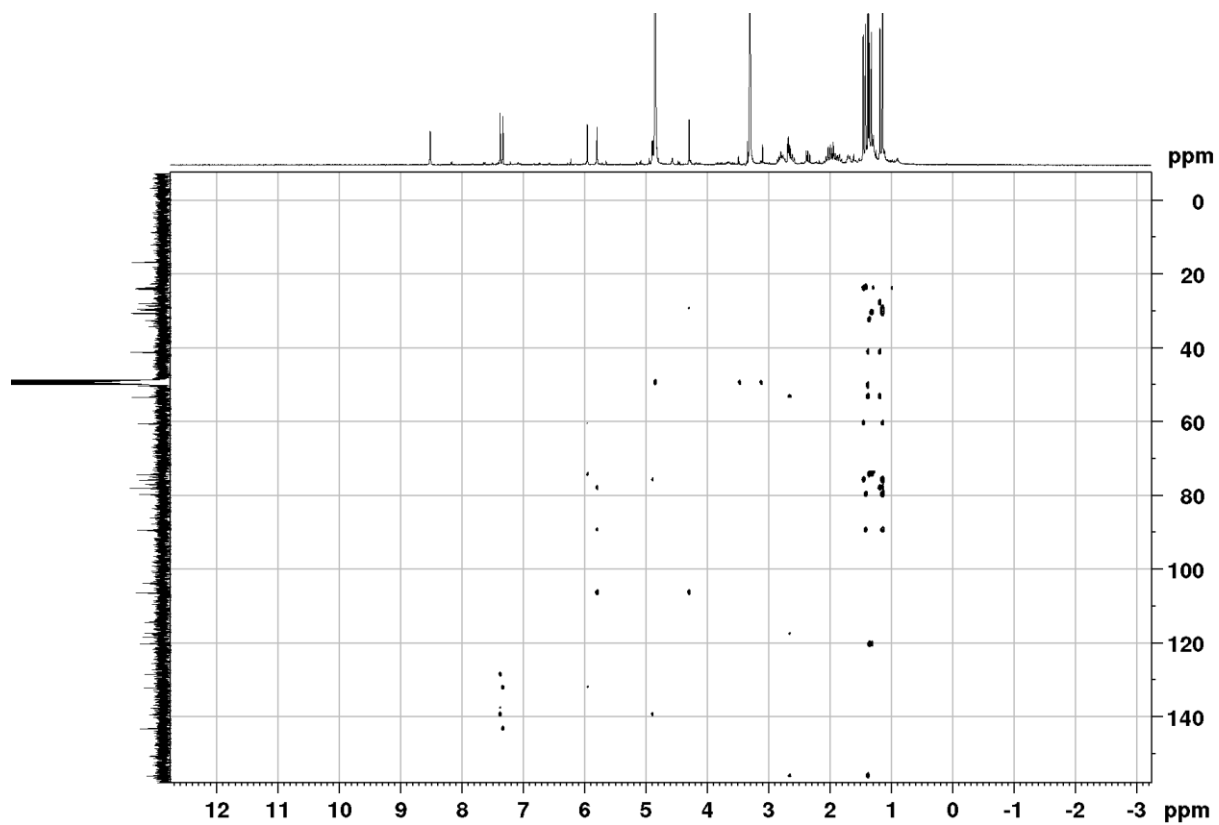

Supplementary Figure 23 | HMBC NMR spectrum (MeOD, 400 MHz) of compound 2

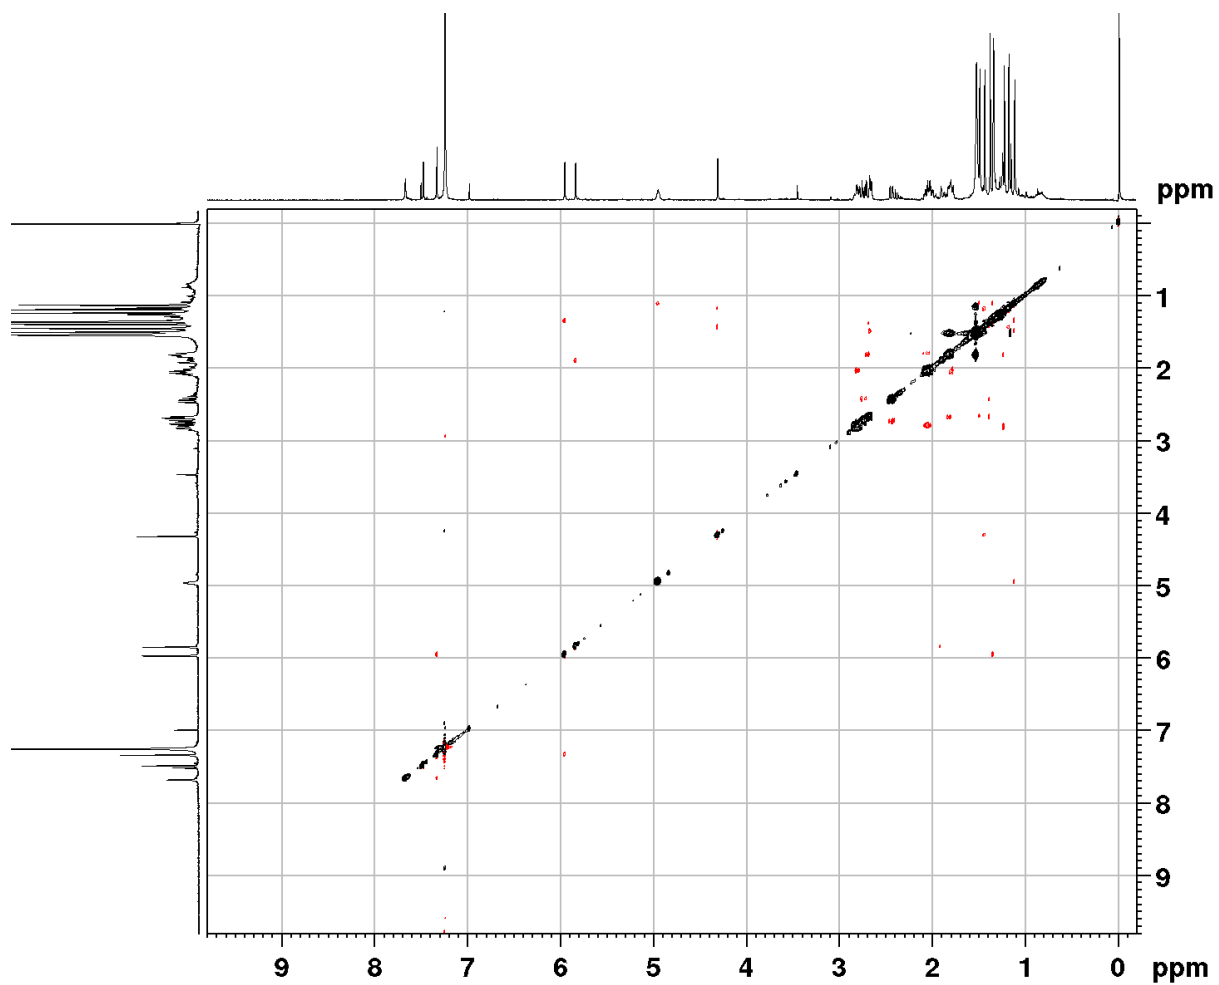

Supplementary Figure 24 | NOESY NMR spectrum (CDCl<sub>3</sub>, 400 MHz) of compound 2

**Supplementary Note 3** | Chemical characterization of melinacidin III (**3**): HR-ESI-MS:  $m/z$  calculated for  $C_{30}H_{29}N_6O_7S_4$ : 713.0975; observed: 713.0969,  $[M+H]^+$ :  $\Delta = -0.84$  ppm. HRMS data are in agreement with the literature <sup>17</sup>.

**Supplementary Note 4** | Chemical characterization of chetracin B (**4**):  $^1\text{H}$  NMR ( $\text{CDCl}_3$ , 400 MHz)  $\delta$  7.73 (1H, m) 7.72 (1H, m) 7.20 (1H, m), 7.16 (1H, m), 6.63-6.89 (4H, m), 5.75 (1H, s), 5.66 (1H, s), 5.07 (1H, s), 5.00 (1H, s), 4.10-4.30 (4H, m), 3.23 (3H, s), 3.09 (3H, s); HR-ESI-MS:  $m/z$  calculated for:  $\text{C}_{30}\text{H}_{29}\text{N}_6\text{O}_8\text{S}_5$ : 761.0645; observed: 761.0670  $[\text{M}+\text{H}]^+$ :  $\Delta = 3.28$  ppm. Analytical data are in full agreement with literature values <sup>18</sup>.

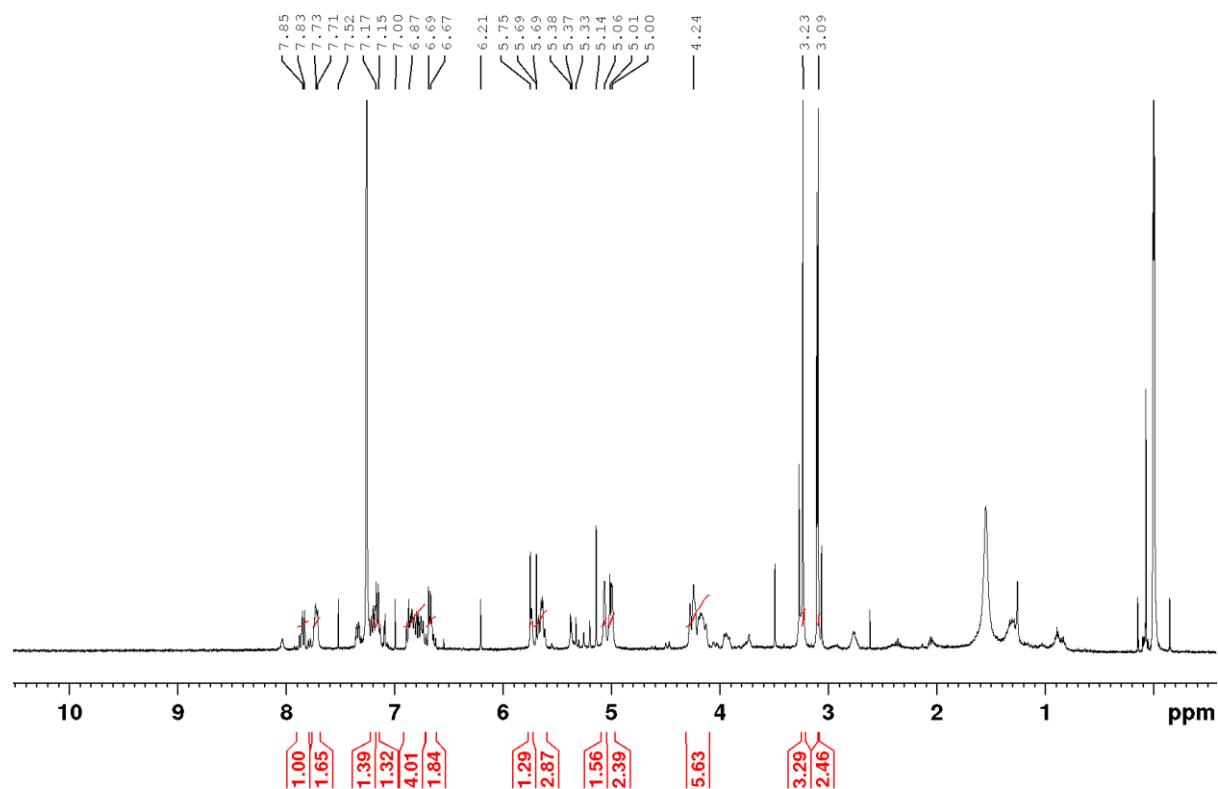

**Supplementary Figure 25** |  $^1\text{H}$  NMR spectrum ( $\text{CDCl}_3$ , 400 MHz) of compound 4

**Supplementary Note 5** | Chemical characterization of chetracin C (**5**):  $^1\text{H}$  NMR (DMSO- $d_6$ , 400 MHz)  $\delta$  7.49 (4H, d,  $J = 7.6$  Hz), 7.05 (4H, m), 6.51-6.63 (4H, m), 5.38 (2H, d,  $J = 5.6$  Hz), 4.71 (2H, s), 4.01 (2H, m) 3.67 (2H, m), 3.10 (6H, s); HR-ESI-MS:  $m/z$  calculated for:  $\text{C}_{30}\text{H}_{29}\text{N}_6\text{O}_8\text{S}_6$ : 793.0366; observed: 793.0351  $[\text{M}+\text{H}]^+$ :  $\Delta = -1.89$  ppm. Analytical data are in full agreement with literature values<sup>18</sup>.

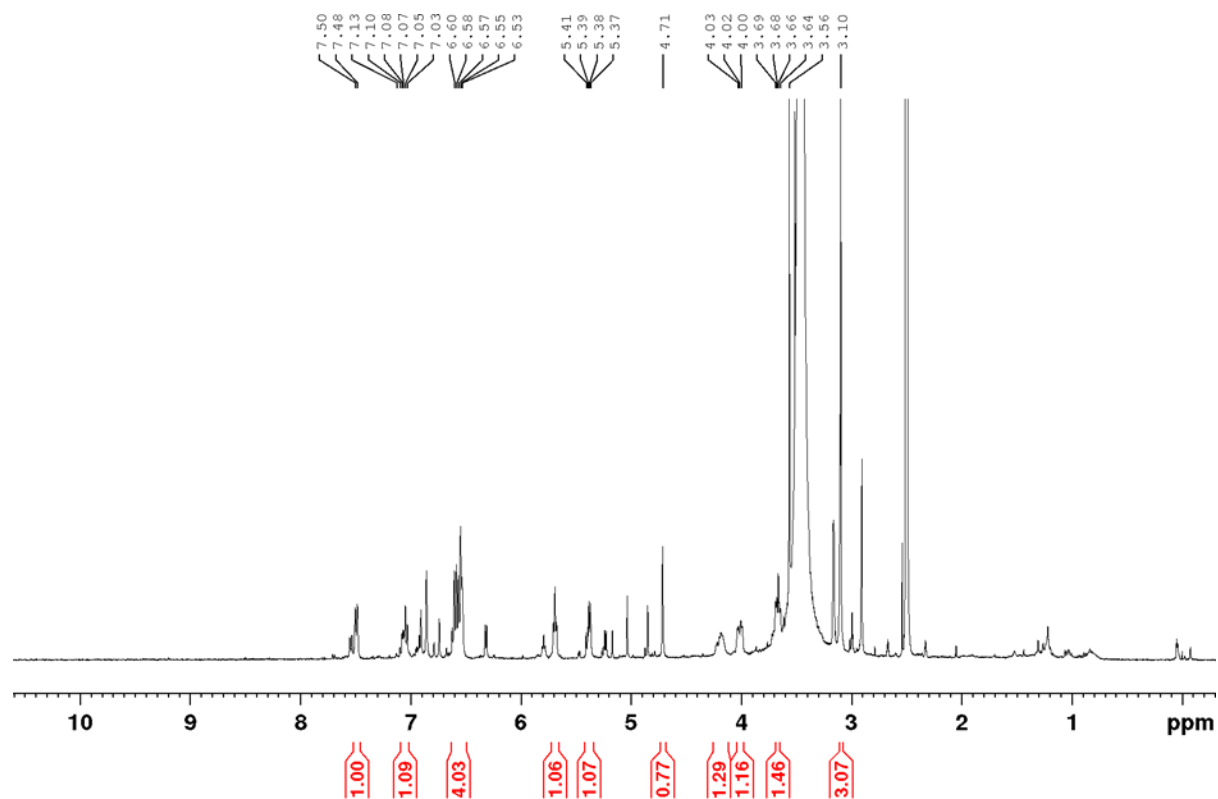

**Supplementary Figure 26** |  $^1\text{H}$  NMR spectrum (DMSO- $d_6$ , 400 MHz) of compound 5



**Supplementary Note 6** | Chemical characterization of shearinine A (**6**):  $^1\text{H}$  NMR ( $\text{CDCl}_3$ , 400 MHz)  $\delta$  7.57 (1H, s), 7.32 (1H, s), 7.24 (1H, s), 5.91 (1H, d,  $J = 3.0$  Hz), 5.83 (1H, d,  $J = 0.8$  Hz), 4.30 (1H, d,  $J = 1.1$  Hz), 3.47 (1H, OH, s), 3.10 (1H, dd,  $J_1 = 15.3$ ,  $J_2 = 9.3$ ), 2.91 (1H, m), 2.61-2.83 (5H, m), 2.40 (1H, dd,  $J_1 = 13.1$ ,  $J_2 = 10.7$ ), 1.94-2.07 (4H, m), 1.75-1.81 (2H, m), 1.43 (3H, s), 1.37 (3H, s), 1.35 (3H, s), 1.32 (6H, s), 1.21 (3H, s), 1.17 (3H, s), 1.07 (3H, s); HR-ESI-MS:  $m/z$  calculated for:  $\text{C}_{37}\text{H}_{46}\text{NO}_5$ : 584.3371; observed: 584.3377  $[\text{M}+\text{H}]^+$ :  $\Delta = 1.03$  ppm. Analytical data are in full agreement with literature values <sup>19</sup>.

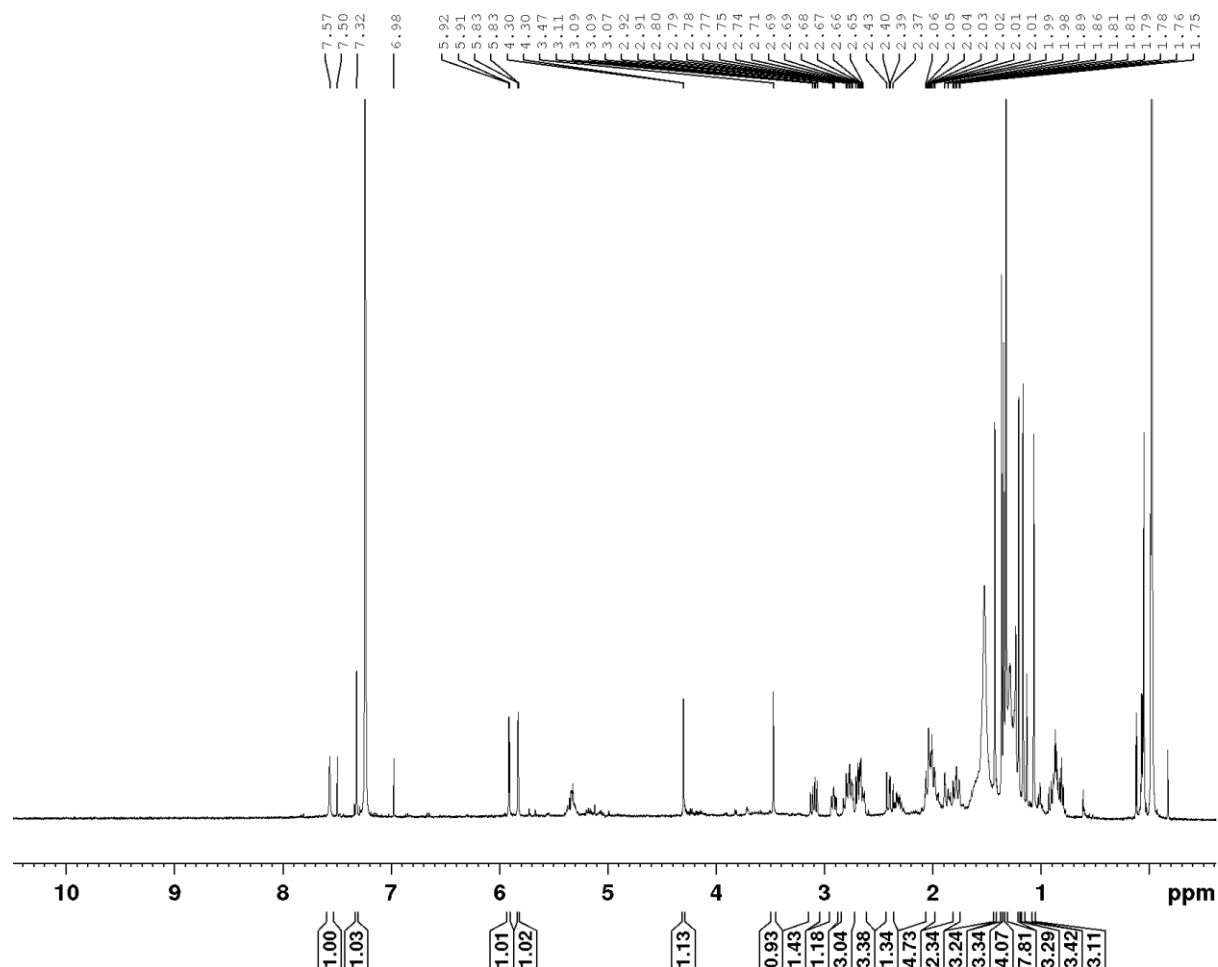

**Supplementary Figure 27** |  $^1\text{H}$  NMR spectrum ( $\text{CDCl}_3$ , 400 MHz) of compound **6**

**Supplementary Note 7** | Chemical characterization of 22,23-dehydro-shearinine A (**7**):  $^1\text{H}$  NMR ( $\text{CDCl}_3$ , 400 MHz)  $\delta$  7.60 (1H, s), 7.41 (1H, s), 7.19 (1H, s), 6.49 (1H, d,  $J = 1.8$ ), 6.36 (1H, d,  $J = 1.8$ ), 5.83 (1H, m), 4.30 (1H, m), 2.82 (2H, m) 2.79 (1H, m), 2.69 (2H, m), 2.64-2.71 (2H, m), 2.04 (1H, m), 2.00 (1H, m), 1.88 (1H, m), 1.78 (1H, m), 1.52 (6H, s), 1.45 (6H, s), 1.43 (3H, s), 1.36 (3H, s), 1.23 (3H, s), 1.17 (3H, s);  $^{13}\text{C}$  NMR ( $\text{CDCl}_3$ , 100 MHz)  $\delta$  197.0, 169.6, 152.0, 141.9, 138.2, 137.0, 134.0, 129.1, 128.6, 125.4, 121.4, 118.2, 117.8, 110.3, 104.4, 104.2, 87.8, 78.8, 77.5, 73.2, 72.7, 51.6, 48.4, 39.9, 33.9, 31.6, 31.0, 28.9, 28.2, 27.6, 27.0, 23.6, 23.1, 21.1, 16.2 ppm; HR-ESI-MS:  $m/z$  calculated for:  $\text{C}_{37}\text{H}_{44}\text{NO}_5$ : 582.3214; observed: 582.3209  $[\text{M}+\text{H}]^+$ :  $\Delta = -0.86$  ppm. All analytical data in agreement with literature values <sup>20</sup>.

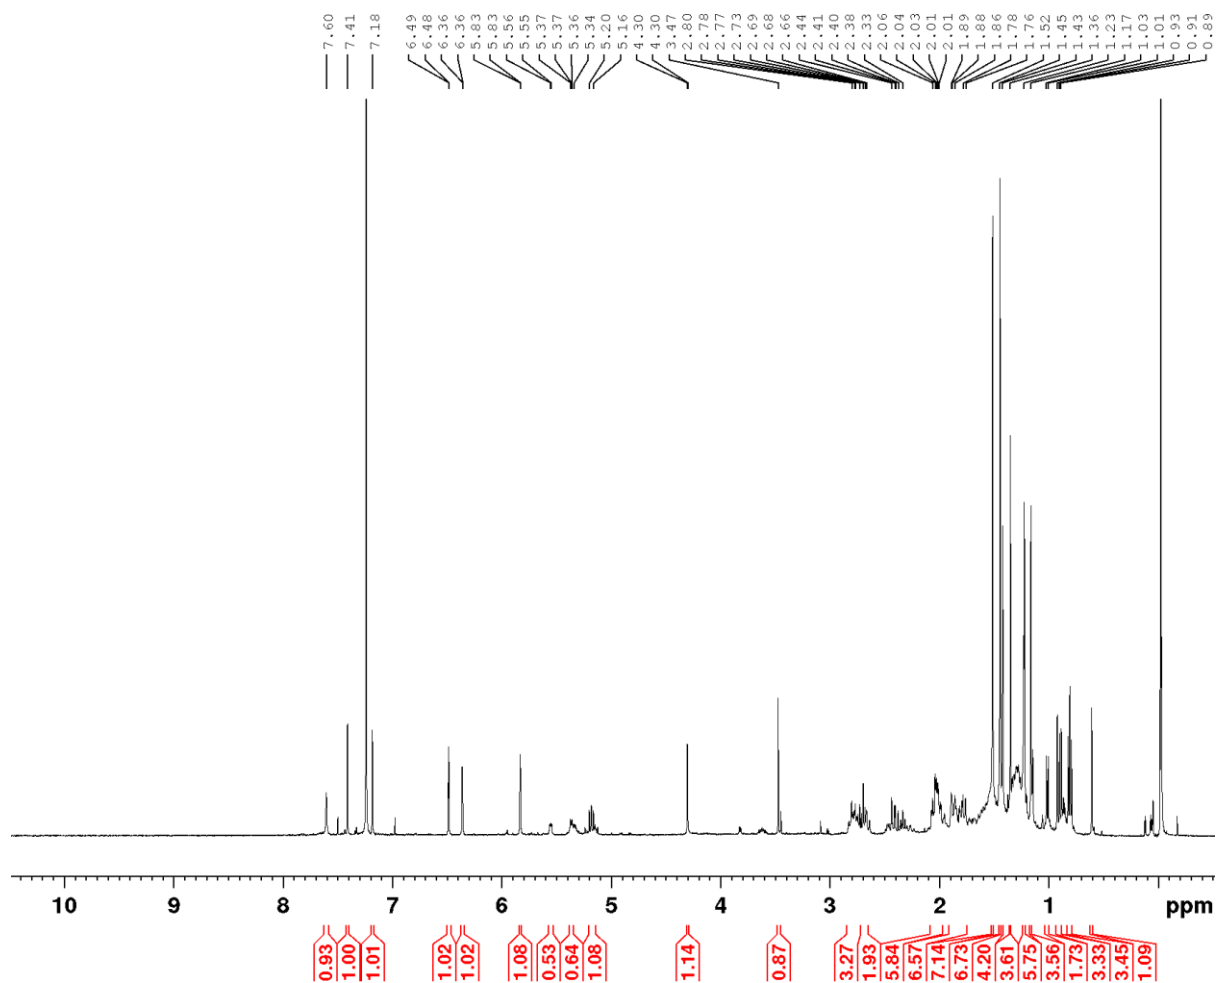

**Supplementary Figure 28** |  $^1\text{H}$  NMR spectrum ( $\text{CDCl}_3$ , 400 MHz) of compound **7**

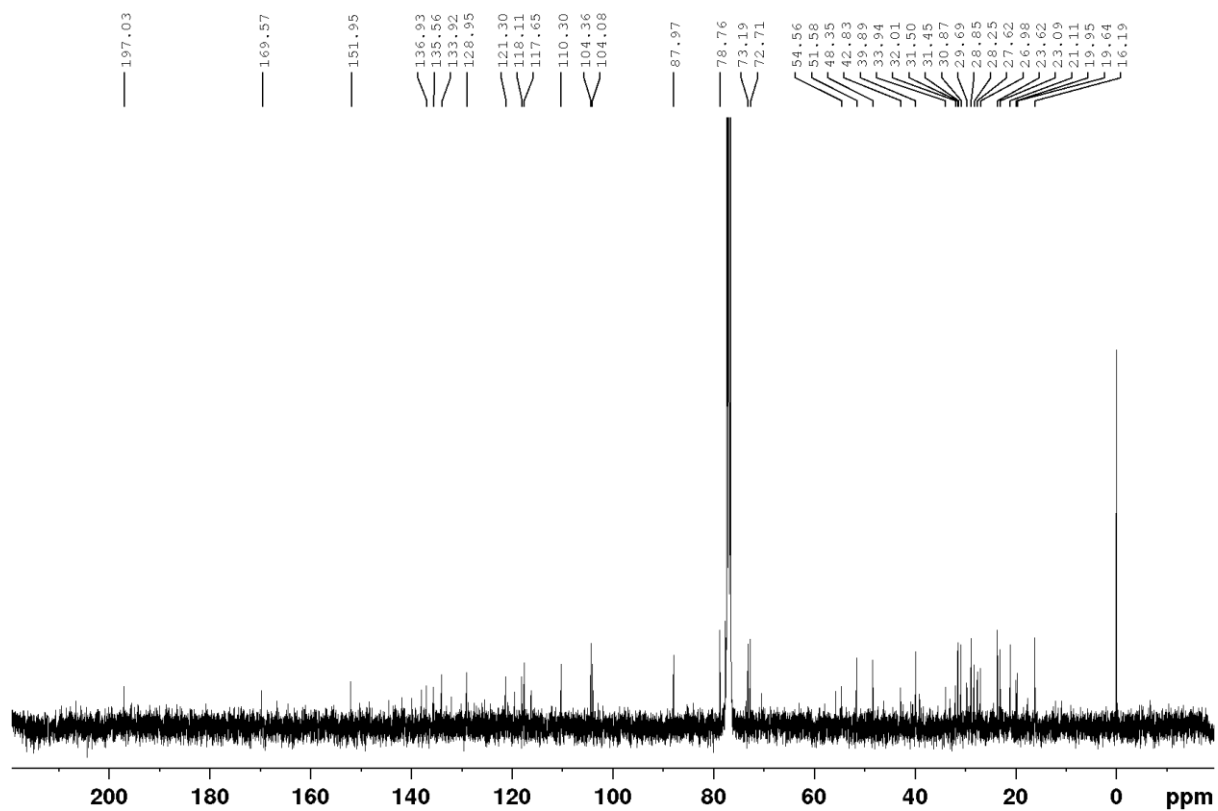

Supplementary Figure 29 | <sup>13</sup>C NMR spectrum (CDCl<sub>3</sub>, 100 MHz) of compound 7

**Supplementary Note 8** | Chemical characterization of emodin (**8**).  $^1\text{H}$  NMR (DMSO- $d_6$ , 400 MHz)  $\delta$  12.10 (1H, bs), 12.04 (1H, bs), 7.51 (1H, m), 7.18 (1H, m), 7.12 (1H, d,  $J = 2.4$  Hz), 6.59 (1H,  $J = 2.4$  Hz), 2.41 (3H, s);  $^{13}\text{C}$  NMR (DMSO, 100 MHz)  $\delta$  189.8, 181.7, 165.8, 164.6, 161.5, 148.4, 135.3, 133.0, 124.3, 120.6, 113.6, 109.1, 109.0, 108.1, 21.7 ppm; HR-ESI-MS:  $m/z$  calculated for:  $\text{C}_{15}\text{H}_{11}\text{O}_5$ : 271.0601; observed: 271.0598  $[\text{M}+\text{H}]^+$ :  $\Delta = -1.11$  ppm Analytical data are in full agreement with literature values <sup>21</sup>.

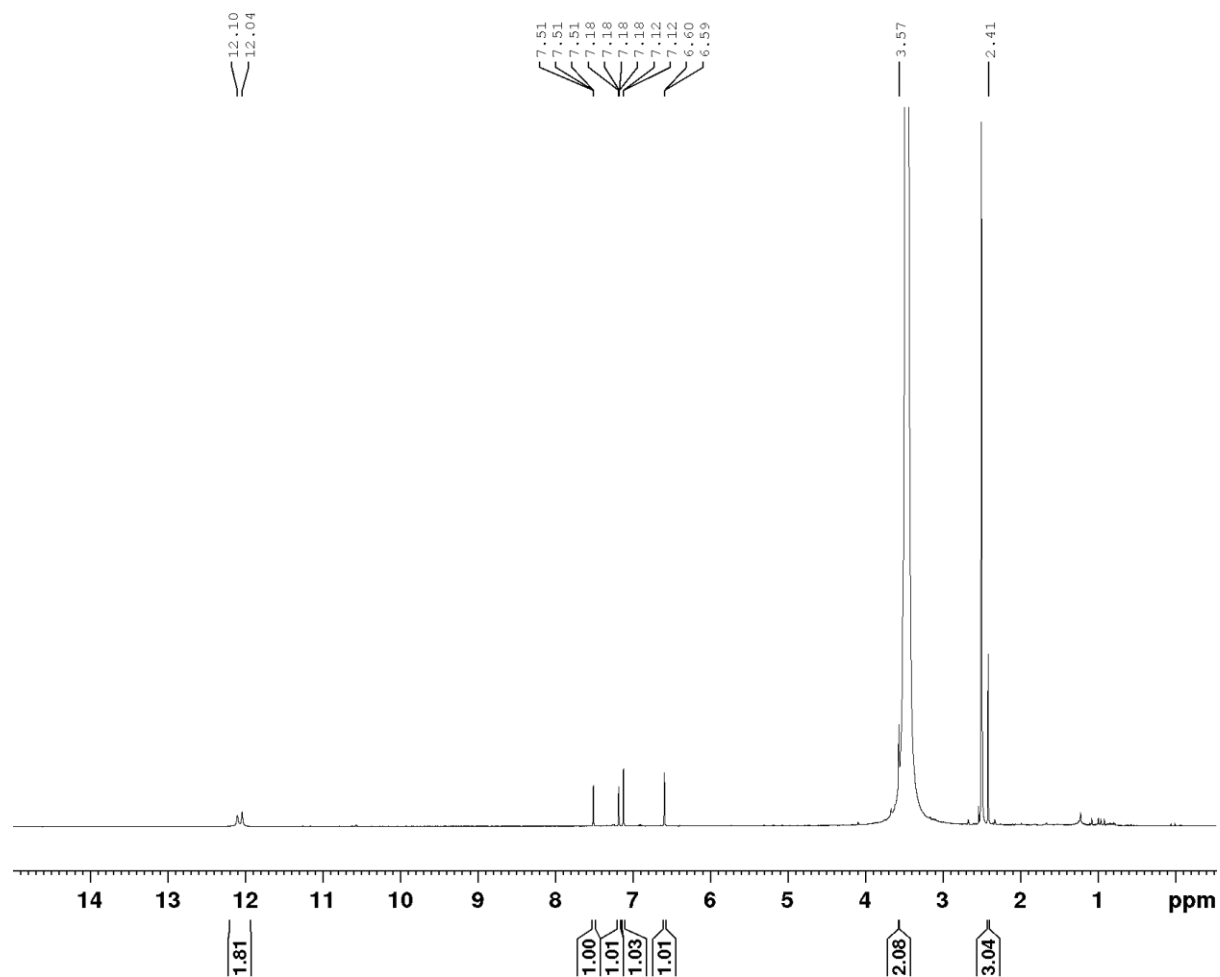

**Supplementary Figure 30** |  $^1\text{H}$  NMR spectrum (DMSO- $d_6$ , 400 MHz) of compound 8

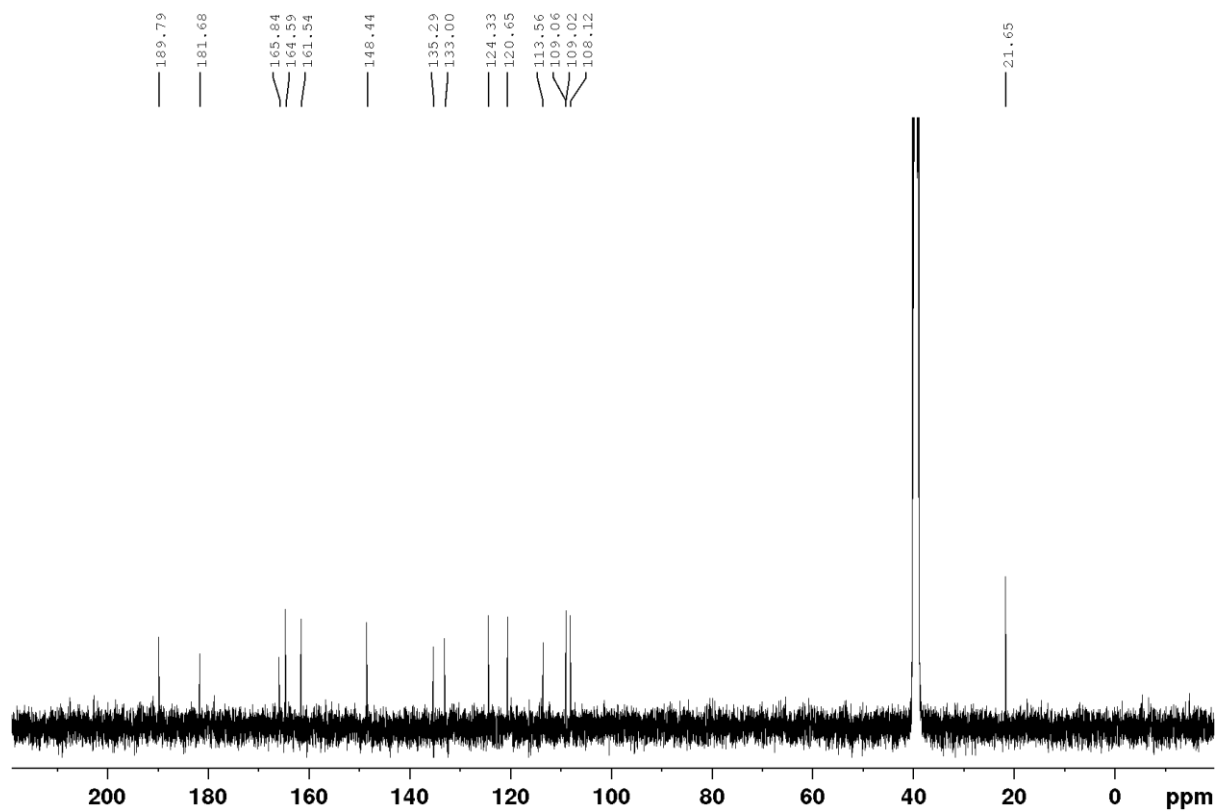

Supplementary Figure 31 |  $^{13}\text{C}$  NMR spectrum (DMSO- $d_6$ , 100 MHz) of compound 8

## Supplementary References

1. Kieser, T. E. *et al.* Practical *Streptomyces* Genetics. Published by the John Innes Foundation. ISBN 0-7084-0623-8 (2000).
2. Nicholson, M. *et al.* Molecular cloning and functional analysis of gene clusters for the biosynthesis of indole-diterpenes in *Penicillium crustosum* and *P. janthinellum*. *Toxins* **7**, 2701–2722 (2015).
3. Gerken, T. & Walsh, C. T. Cloning and sequencing of the chaetocin biosynthetic gene cluster. *ChemBioChem* **14**, 2256–2258 (2013).
4. Chiang, Y.-M. *et al.* Characterization of the *Aspergillus nidulans* monodictyphenone gene cluster. *Appl. Environ. Microbiol.* **76**, 2067–2074 (2010).
5. Sievers, F. *et al.* Fast, scalable generation of high-quality protein multiple sequence alignments using Clustal Omega. *Mol. Syst. Biol.* **7**, 539 (2011).
6. Chaverri, P., Castlebury, L. A., Overton, B. E. & Samuels, G. J. *Hypocrea/Trichoderma*: species with conidiophore elongations and green conidia. *Mycologia* **95**, 1100–1140 (2003).
7. Meirelles, L. A. *et al.* Shared *Escovopsis* parasites between leaf-cutting and non-leaf-cutting ants in the higher attine fungus-growing ant symbiosis. *R. Soc. Open Sci.* **2**:150257 (2015).
8. Rodrigues, A. *et al.* Microfungal "weeds" in the leafcutter ant symbiosis. *Microb. Ecol.* **56**(4), 604-614 (2008).
9. Kuhls, K. *et al.* Revision of *Trichoderma* sect. *Longibrachiatum* including related teleomorphs based on analysis of ribosomal DNA internal transcribed spacer sequences. *Mycologia*. **89**, 442-460 (1997).
10. Hoyos-Carvajal, L. *et al.* Genetic and metabolic biodiversity of *Trichoderma* from Colombia and adjacent neotropic regions. *Fungal. Genet. Biol.* **46**, 615-631 (2009).
11. Nixon, K. C. WinClada ver. 1.0000. Published by the author, Ithaca, NY, USA (1999-2002).
12. de Man, T. J. B. *et al.* Small genome of the fungus *Escovopsis weberi*, a specialized disease agent of ant agriculture. *Proc. Natl. Acad. Sci. USA* **113**, 3567-3572 (2016).
13. Camacho, C. *et al.* BLAST+: architecture and applications. *BMC Bioinformatics* **10**, 421 (2009).
14. Wang, Y., Tian, R. M., Gao, Z. M., Bougouffa, S. & Qian, P.-Y. Optimal eukaryotic 18S and universal 16S/18S ribosomal RNA primers and their application in a study of symbiosis. *PLoS ONE* **9**:e90053 (2014).
15. Argoudelis, A. D. & Mizensak, S. A. Melinacidins II, III and IV. Structural studies. *J. Antibiot.* **30**, 468–473 (1977).
16. Xu, M. *et al.* Shearinines D–K, new indole triterpenoids from an endophytic *Penicillium* sp. (strain HKI0459) with blocking activity on large-conductance calcium-activated potassium channels. *Tetrahedron* **63**, 435–444 (2007).
17. Watts, K. R. *et al.* Assessing the trypanocidal potential of natural and semi-synthetic diketopiperazines from two deep water marine-derived fungi. *Bioorg. Med. Chem.* **18**, 2566–2574 (2010).
18. Li, L., Li, D., Luan, Y., Gu, Q. & Zhu, T. Cytotoxic metabolites from the antarctic psychrophilic fungus *Oidiodendron truncatum*. *J. Nat. Prod.* **75**, 920–927 (2012).
19. Belofsky, G. N., Gloer, J. B., Wicklow, D. T. & Dowd, P. F. Antiinsectan alkaloids: Shearinines A-C and a new paxilline derivative from the ascostromata of *Eupenicillium shearii*. *Tetrahedron* **51**, 3959–3968 (1995).
20. You, J., Du, L., King, J. B., Hall, B. E. & Cichewicz, R. H. Small-molecule suppressors of *Candida albicans* biofilm formation synergistically enhance the

- antifungal activity of amphotericin B against clinical *Candida* isolates. *ACS Chem. Biol.* **8**, 840–848 (2013).
21. Wang, C., Guo, L., Hao, J., Wang, L. & Zhu, W.  $\alpha$ -Glucosidase inhibitors from the marine-derived fungus *Aspergillus flavipes* HN4-13. *J. Nat. Prod.* **79**, 2977–2981 (2016).
