# Supplementary material for: Chemical warfare between leafcutter ant symbionts and a co-evolved pathogen
Source: PubMed Central journal article supplement (PMC5992151; doi:10.1038/s41467-018-04520-1), 2018-06-07
Supplement: 41467_2018_4520_MOESM3_ESM.pdf [file 41467_2018_4520_MOESM3_ESM.pdf]

## **Description of Additional Supplementary Files:**

**Supplementary Movie 1** | A time-lapse video comparing the level of mobility shown by ants fed on different dietary concentrations of compound 2. Concentrations are 0 mM, 0.1 mM, 0.25 mM (bottom left to bottom right Petri dishes) and 0.5 mM, 1 mM and 2 mM (top left to top right Petri dishes). A decrease in ant mobility can be seen from bottom left to top right.  $N = 5$  ants per concentration group. The time-lapse video was made over approximately three hours, with 10 second intervals between frames.

**Supplementary Movie 2** | A time-lapse video comparing ants fed on either glucose water (left petri dish), or glucose water supplemented with 1 mM of compound 2.  $N = 5$  ants per treatment group. The time-lapse video was made over approximately three hours, with 10 second intervals between frames.
